# 1 Cortical idiosyncrasies predict the perception of object size

2

3 Christina Moutsiana<sup>1\*</sup>, Benjamin de Haas<sup>1,2\*</sup>, Andriani Papageorgiou<sup>1</sup>, Jelle A. van Dijk<sup>1,2</sup>, Annika  
4 Balraj<sup>1,3</sup>, John A. Greenwood<sup>1</sup> & D. Samuel Schwarzkopf<sup>1,2#</sup>

5

6 <sup>1</sup> Experimental Psychology, University College London, 26 Bedford Way, London, U.K.

7 <sup>2</sup> UCL Institute of Cognitive Neuroscience, 17 Queen Square, London, U.K.

8 <sup>3</sup> Columbian College of Arts and Sciences, The George Washington University, 2125 G St. NW,  
9 Washington, 20052, U.S.A.

10

11 \* These authors contributed equally

12 # To whom all correspondence should be directed

13

## 14 Abstract

15 *Perception is subjective. Even basic judgments, like those of visual object size, vary substantially*  
16 *between observers and also across the visual field within the same observer. The way in which the*  
17 *visual system determines the size of objects remains unclear, however. We hypothesize that object*  
18 *size is inferred from neuronal population activity in V1 and predict that idiosyncrasies in cortical*  
19 *functional architecture should therefore explain individual differences in size judgments. Indeed,*  
20 *using novel behavioral methods and functional magnetic resonance imaging (fMRI) we demonstrate*  
21 *that biases in size perception are correlated with the spatial tuning of neuronal populations in*  
22 *healthy volunteers. To explain this relationship, we formulate a population read-out model that*  
23 *directly links the spatial distribution of V1 representations to our perceptual experience of visual size.*  
24 *Altogether, we suggest that the individual perception of simple stimuli is warped by idiosyncrasies in*  
25 *visual cortical organization.*

26 How do we perceive the size of an object? A range of recent observations have lent support to the  
27 hypothesis that the visual system generates the perceived size of an object from its cortical  
28 representation in early visual cortex<sup>1</sup>. In particular, the spatial spread of neural activity in visual  
29 cortex has been related to apparent size under a range of contextual modulations<sup>2-7</sup>. The strength of  
30 contextual size illusions has further been linked to the cortical territory in V1 that represents the  
31 central visual field<sup>8,9</sup>. These findings suggest that lateral connections in V1 may play a central role in  
32 size judgments because these interactions are reduced when V1 surface area is larger. Indeed,  
33 similar interactions have been argued to underlie the strength of the tilt illusion<sup>10,11</sup>, perceptual  
34 alternations in binocular rivalry<sup>12</sup>, the influence of distractors in visual search tasks<sup>13</sup>, and visual  
35 working memory capacity<sup>14</sup>. Even the precision of mental imagery co-varies with V1 area<sup>15</sup>  
36 suggesting V1 may be used as a ‘workspace’ for storing mental images whose resolution is better  
37 when surface area is larger.

38 However, these previous findings do not demonstrate that V1 representations *per se* are relevant for  
39 size judgments, and in particular for *subjective* judgments of object size. If V1 signals were indeed  
40 the basis for these judgments then variations in the functional architecture of V1 should explain  
41 *idiosyncratic biases in basic size perception* (i.e. size judgements that occur in the absence of any  
42 contextual/illusory effects). To date this prediction remains untested. Previous neuroimaging  
43 experiments have focused on modulations of apparent size that must involve additional processing,  
44 either due to local interactions between adjacent stimuli in V1 or by a context that likely involves  
45 processing in higher visual areas. Others have shown that the *objective* ability to discriminate subtle  
46 differences between stimuli is related to cortical magnification and spatial tuning in early visual  
47 cortex<sup>11,16,17</sup>. However, no experiment to date has shown a relationship between V1 and *subjective*  
48 perceptual biases in the *absence of any contextual interaction*, even though there are considerable  
49 individual differences in perceptual biases.

50 It is well established that subjective size judgments for simple, small stimuli can vary substantially  
51 between observers and even across the visual field within the same observer. Previous behavioral  
52 research has shown that small visual stimuli appear smaller when they are presented in the  
53 periphery<sup>18–20</sup>. A simple explanation for this could be the impoverished encoding of stimuli in  
54 peripheral vision. However, when stimuli are dimmed artificially to mimic the peripheral decrease in  
55 visibility, the same biases are not found<sup>19</sup>. Another explanation could be that higher brain regions  
56 that integrate the perceptual input to V1 into a behavioral decision are poorly calibrated against the  
57 decrease in cortical magnification when moving from central to peripheral vision. Small errors in this  
58 calibration would cause a residual misestimation of stimulus size based on V1 representations and in  
59 turn lead to perceptual misestimation<sup>20</sup>. However, neither of these models can explain why these  
60 perceptual biases are consistent underestimates of stimulus size. Impoverished stimulus encoding  
61 alone should only result in poorer acuity while residual errors in calibration would be expected to  
62 show both under- and overestimation. Furthermore, recent research has also demonstrated reliable  
63 heterogeneity in size judgments across the visual field within individual observers at iso-eccentric  
64 locations<sup>9,21</sup>. We can consider these variations as a ‘perceptual fingerprint’ that is unique to each  
65 observer. The neural basis of these individual differences however remains unknown.

66 In the present study we used fMRI to compare perceptual biases in size judgments with individual  
67 functional architecture in V1 – specifically, the population receptive field (pRF) spread and local  
68 cortical surface area. To do so we developed the Multiple Alternative Perceptual Search (MAPS) task.  
69 This approach combines a matching task with analyses similar to reverse correlation<sup>22,23</sup>. Observers  
70 search a peripheral array of multiple candidate stimuli for the one whose subjective appearance  
71 matches that of a centrally presented reference. This task allows measurement of subjective  
72 appearance whilst minimizing the decisional confounds present in more traditional tasks like  
73 stimulus adjustment or the method of constant stimuli<sup>24–26</sup>. The MAPS task further estimates  
74 perceptual biases and discrimination acuity while several stimuli are presented simultaneously. We  
75 consider this a more naturalistic task, akin to our daily perceptual judgments (Figure 1A), compared  
76 with traditional psychophysical tasks involving single, isolated objects.

77

78

79

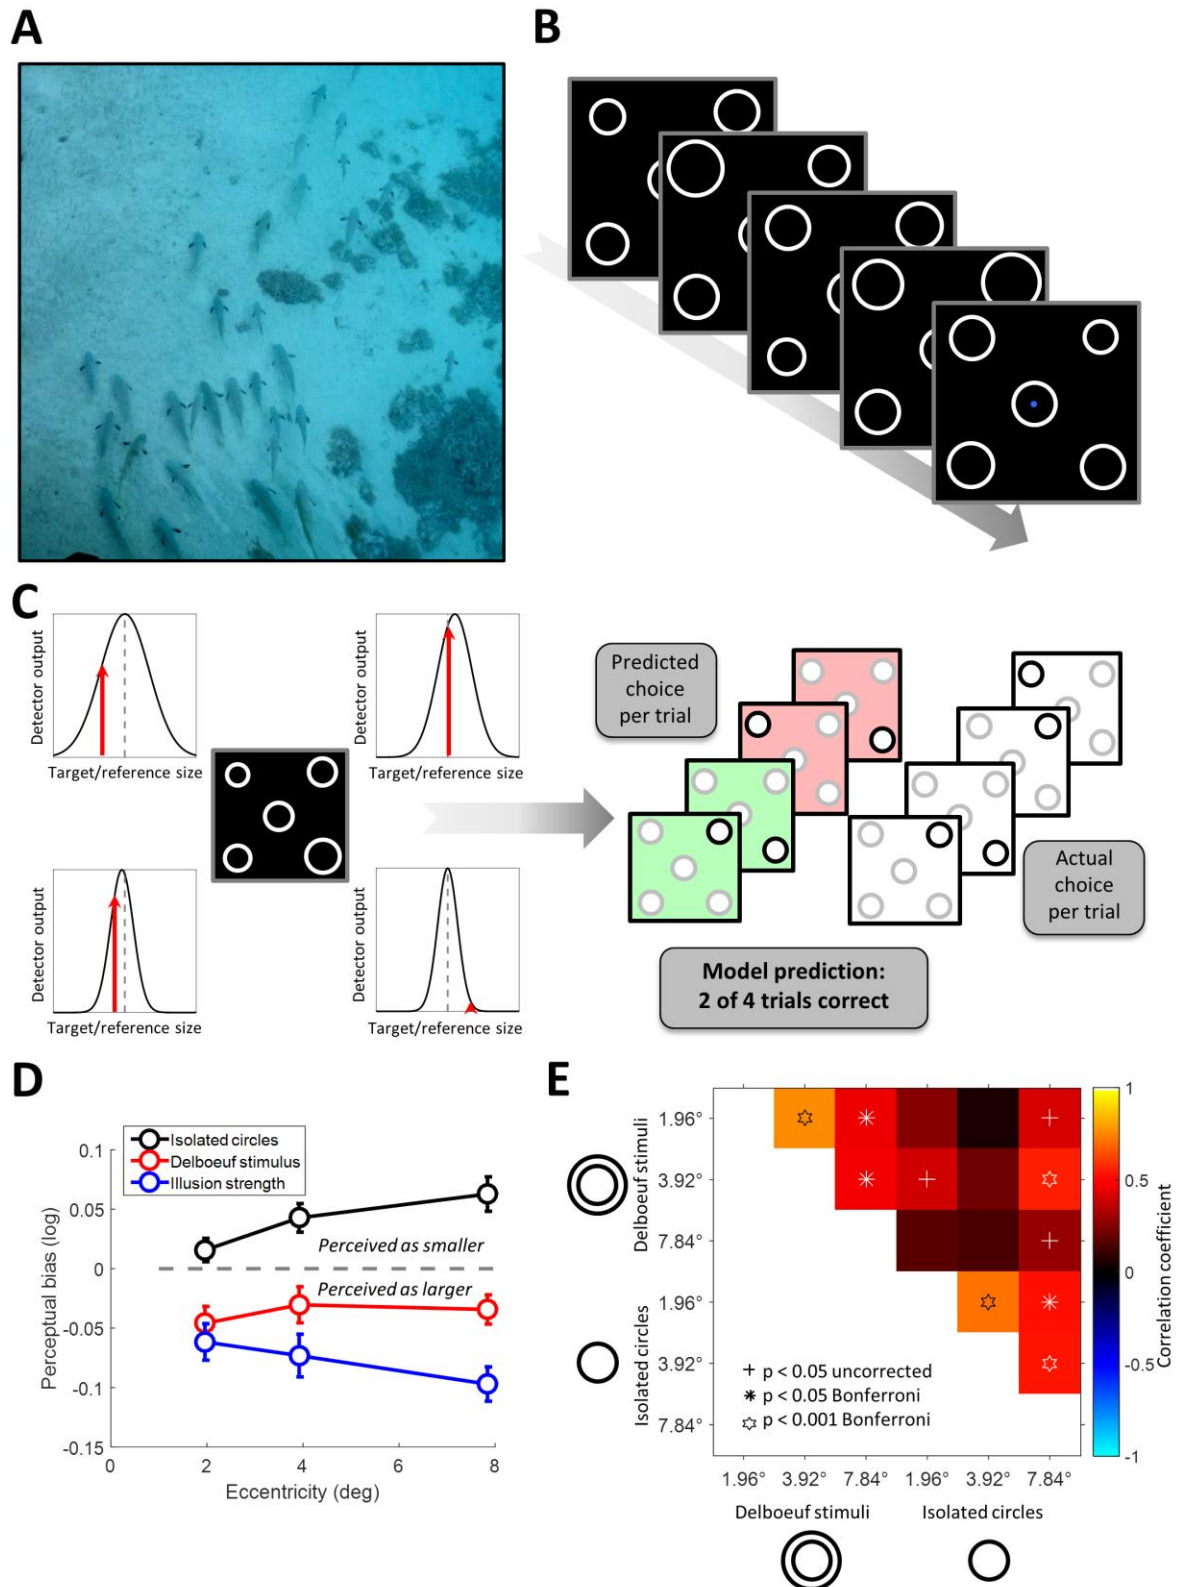

80  
 81 **Figure 1.** Idiosyncratic biases in size perception. **A.** Visual objects often appear in the presence of similar objects. For  
 82 example, a spearfisherman may be searching this school for the largest fish. What is the neural basis for this judgment? **B.**  
 83 The MAPS task. In each trial, observers fixated on the center of the screen and viewed an array of five circles for 200ms.  
 84 The central circle was constant in size, while the others varied across trials. Each frame here represents the stimulus from  
 85 one trial. The arrow denotes the flow of time. Observers judged which of the circles in the four corners appeared most  
 86 similar in size to the central one. **C.** Analysis of behavioral data from MAPS task. The behavioral responses in each trial  
 87 were modeled by an array of four “neural detectors” tuned to stimulus size (expressed as the binary logarithm of the ratio

88 between the target and the reference circle diameters). Tuning was modeled as a Gaussian curve. The detector showing  
89 the strongest output to the stimulus (indicated by the red arrows) determined the predicted behavioral response in each  
90 trial (here, the top-right detector would win). Model fitting minimized the prediction error (in this example the model  
91 predicted the actual behavioral choice correctly for 50% of trials) across the experimental run by adapting the mean and  
92 dispersion of each detector. **D.** Average perceptual bias (positive and negative: target appears smaller or larger than  
93 reference, respectively), across individuals plotted against target eccentricity for simple isolated circles (black), contextual  
94 Delboeuf stimuli (red), and relative illusion strength (blue), that is, the difference in biases measured for the two stimulus  
95 conditions. Error bars denote  $\pm 1$  standard error of the mean. **E.** Correlation matrix showing the relationship of unique  
96 patterns of perceptual biases in the two conditions (isolated circles and Delboeuf stimuli) and at the three target  
97 eccentricities. Color code denotes the correlation coefficient. Symbols denote statistical significance. Crosses:  $p < 0.05$   
98 uncorrected. Asterisks:  $p < 0.05$  Bonferroni corrected. Hexagrams:  $p < 0.001$  Bonferroni corrected.

99

## 100 **Results**

101 Thirteen normal, healthy observers viewed an array of 5 circles on each trial and made a perceptual  
102 judgment (Figure 1B). The central circle was constant in size and served as the reference. Observers  
103 reported which of the four target circles appeared most similar in size to the reference. We fit a  
104 model to explain each observer's behavioral responses, with each of the four target locations  
105 modeled via the output of a detector tuned to stimulus size. In each trial the detector showing the  
106 strongest response was used to predict the observer's behavioral choice. This procedure allowed the  
107 estimation of both raw perceptual bias and uncertainty (dispersion) at each location (Figure 1C).

### 108 *Apparent size depends on eccentricity*

109 Peripheral stimuli appeared smaller on average than the central reference, confirming earlier  
110 reports<sup>18,20,27</sup>. This reduction in apparent size increased with stimulus eccentricity (Figure 1D, black  
111 curve). When instead of isolated circles we presented the target circles inside larger concentric  
112 circles, perceptual biases were predictably shifted in the other direction (the Delboeuf illusion<sup>28</sup>) so  
113 that targets appeared on average larger than the reference (Figure 1D, red curve). This illusory effect  
114 interacted with the effect of eccentricity on apparent size, leading again to a gradual reduction in  
115 (illusory) size as stimuli moved into the periphery. This differs somewhat from the classical Delboeuf  
116 illusion, where perceptual biases are typically compared to a reference either at the same  
117 eccentricity or even at the same stimulus location. In contrast, in our task the reference is at fixation.  
118 To disentangle the illusion from the effect of eccentricity, we therefore also calculated the *Relative*  
119 *illusion strength*, that is, the difference in perceptual bias for isolated circles and the illusion stimuli  
120 at each location. This effect (here an *increase* in apparent size) also increased with eccentricity  
121 (Figure 1D blue curve; but note that since observers never compared the stimuli directly at iso-  
122 eccentric locations this may not fully account for the classical Delboeuf illusion). To summarize,  
123 objects appear increasingly smaller as they move into peripheral vision, where the magnitude of size  
124 illusions also has an increasing effect (here with the Delboeuf illusion to make them appear larger).

125 These results cannot be trivially explained by differences in discrimination acuity. Because spatial  
126 resolution decreases in peripheral vision, it is theoretically possible that bias estimates are noisier at  
127 greater eccentricities and thus produce this pattern of results, in particular for the Delboeuf stimuli  
128 where bias magnitude decreases. To rule out this confound we also calculated mean bias estimates  
129 weighted by the precision of observers' size estimates (i.e. the reciprocal of dispersion) at the  
130 corresponding locations. The pattern of results is very similar to the one for raw biases  
131 (Supplementary Figure S1A). Two years after the initial experiment, we also conducted another small

132 experiment on four observers. In this experiment we included two larger eccentricities (11.76° and  
133 15.68°). This confirmed that the size of isolated circles continue to be underestimated even at larger  
134 eccentricities. In contrast, although the size of Delboeuf stimuli is overestimated at the more central  
135 eccentricities, the bias magnitude decreases with eccentricity and is close to zero at the most  
136 peripheral location tested (Supplementary Figure S1B). However, the accuracy of performing the  
137 MAPS task also decreases with eccentricity, especially for Delboeuf stimuli (Supplementary Figure  
138 S1C) presumably because crowding makes it difficult to separate the inner and outer circle.

### 139 *Idiosyncratic biases in size perception*

140 Critically, we next analyzed the *idiosyncratic pattern* of perceptual biases for each observer by  
141 comparing biases across the visual field, for both isolated circles and Delboeuf stimuli. To do so, bias  
142 estimates were taken from all observers in each visual field quadrant, separately for each  
143 eccentricity and stimulus type (that is, each visual field location was treated as a separate data point,  
144 so  $n=40$ ). Biases were strongly correlated across both stimulus type and over the three eccentricities  
145 tested (Figure 1E and Supplementary Figure S2). That is, if observers perceived a strong reduction in  
146 the apparent size of a stimulus at a given location, they tended to show strong reductions for the  
147 same stimulus type within the same visual field quadrant, regardless of eccentricity. Variations  
148 between different quadrants of this kind are consistent with the anatomical separation of visual  
149 quadrant maps in retinotopic areas. Psychophysical studies suggest that similarly coarse differences  
150 may be common, for instance with the frequent observation that performance in the lower visual  
151 field exceeds that in the upper visual field<sup>29,30</sup>. We further confirmed that these bias estimates were  
152 highly reliable even between testing sessions separated by one or two years (Supplementary  
153 Information: Reliability of perceptual bias estimates).

### 154 *Perceptual biases correlate with spatial tuning in visual cortex*

155 Next we employed functional magnetic resonance imaging (fMRI) with population receptive field  
156 (pRF) mapping to estimate the tuning of V1 voxels to spatial position (Figure 2A-B<sup>31-33</sup>). Importantly,  
157 these neuroimaging experiments were independent from the behavioral experiments and  
158 conducted many months later in a different testing environment (MRI scanner vs behavioral testing  
159 room).

160 Interestingly, this analysis revealed a systematic relationship between perceptual biases and pRF  
161 spread (also known as pRF size or the  $\sigma$  parameter of the Gaussian pRF model). With data averaged  
162 across observers, increasing eccentricity gives both an increase in pRF spread<sup>31</sup> (see Supplementary  
163 Data File 1) and a decrease in apparent size (Figure 1D). We then considered individual data by  
164 calculating the correlation between pRF spread and perceptual biases. To do so, we considered  
165 every stimulus *location* in every observer as a separate observation ( $n=120$ ). Both isolated circles  
166 ( $r=0.43$ ,  $p<0.0001$ ; Figure 2C) and Delboeuf stimuli ( $r=0.21$ ,  $p=0.0223$ ; Figure 2D) were perceived as  
167 smaller when they were presented at visual field locations covered by voxels with larger pRFs. We  
168 obtained similar results when analyzing data separately for each eccentricity ( $n=40$ ), except for the  
169 Delboeuf stimuli at the largest eccentricity (Supplementary Figure S3A-B). These individual  
170 differences demonstrate that there is correlation between pRFs and apparent size for *idiosyncratic*  
171 *variations* at a *fixed* eccentricity. Our relative illusion strength also showed a negative correlation  
172 with pRF spread ( $r=-0.22$ ,  $p=0.0166$ ,  $n=120$ ; Figure 2E), indicating that larger pRFs were associated



173 with smaller differences between raw biases for Delboeuf stimuli and isolated circles. This result was  
 174 however largely driven by the results for the largest eccentricity (Supplementary Figure S3C).

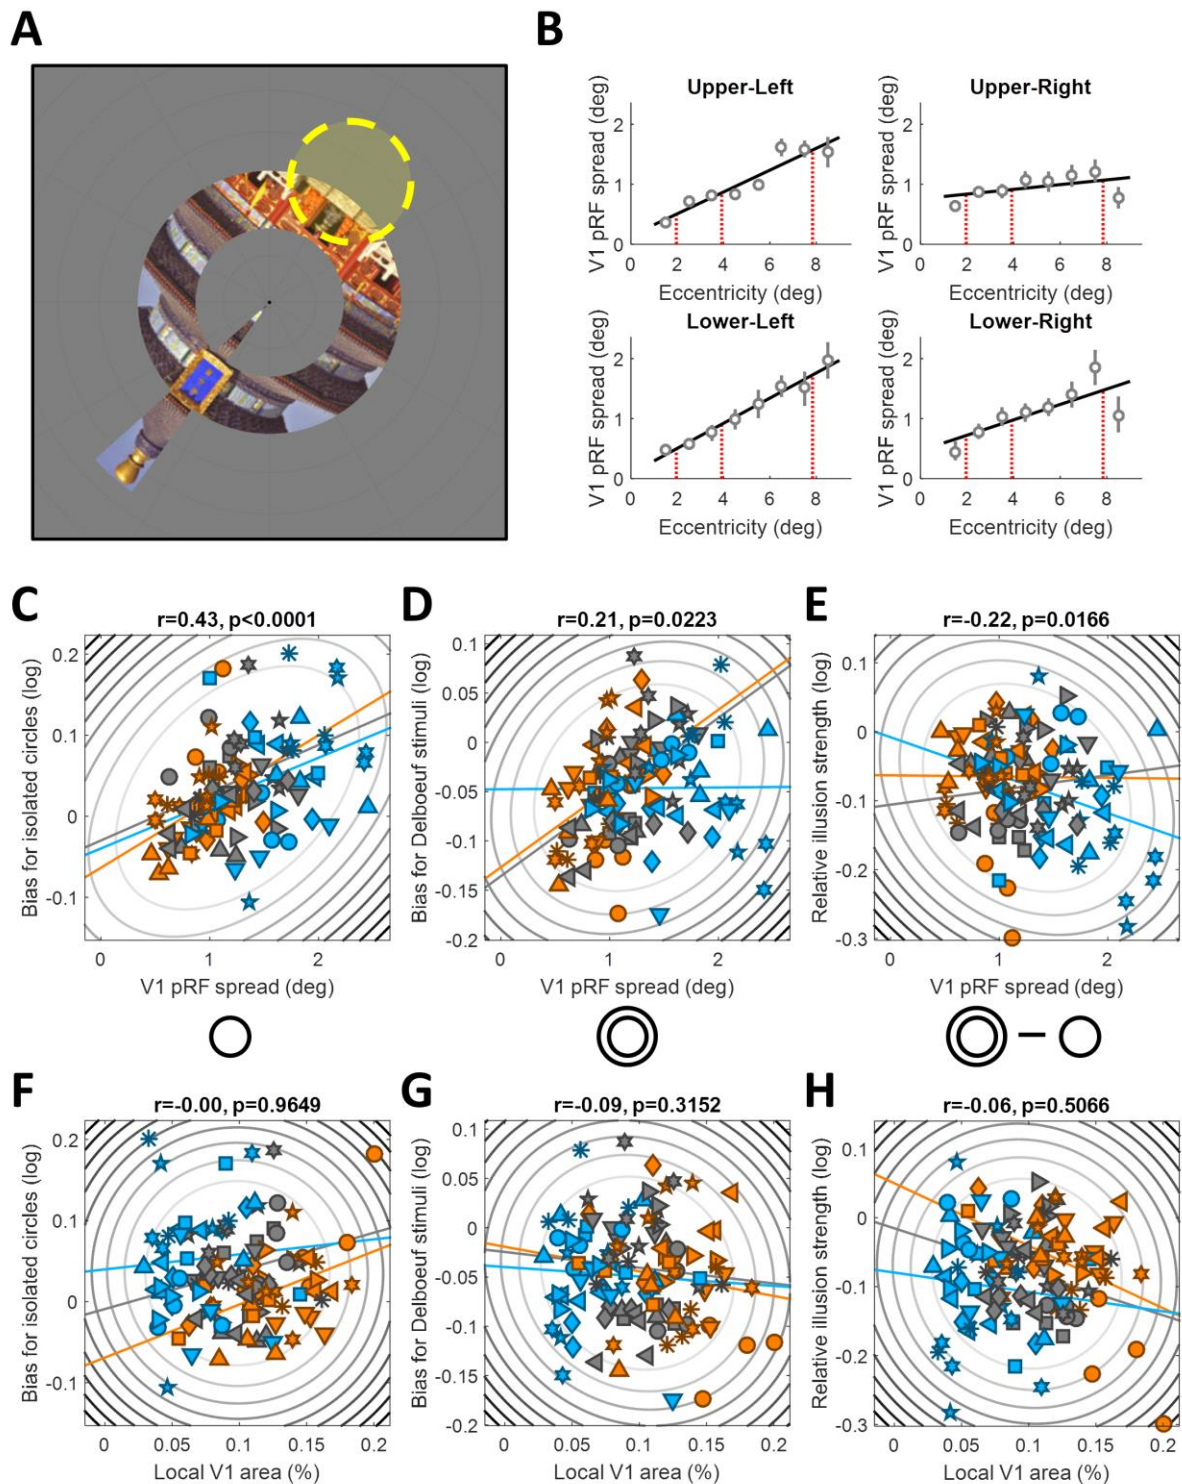

175

176 **Figure 2.** Neural correlates of size perception. **A.** Population receptive field (pRF) mapping with fMRI. Observers viewed  
 177 natural images presented every 500ms within a combined wedge-and-ring aperture. In alternating runs the wedge rotated  
 178 clockwise/counterclockwise in discrete steps (1Hz) around the fixation dot while the ring either expanded or contracted. A  
 179 forward model estimated the position and size of the pRF (indicated by yellow circle) that best explained the fMRI  
 180 response to the mapping stimulus. **B.** We estimated the pRF spread corresponding to each target location in the behavioral  
 181 experiment by fitting a first-order polynomial function (solid black line) to pRF spreads averaged within each eccentricity

182 band for each visual quadrant and extrapolating the pRF spread at the target eccentricities. Grey symbols in the four plots  
183 show the pRF spread by eccentricity plots for the four target locations (see insets) in one observer. Grey error bars denote  
184 bootstrapped 95% confidence intervals. The solid black line shows the polynomial fit used to estimate pRF spread at each  
185 target location. The vertical red dashed lines denote the three stimulus eccentricities at which we extrapolated pRF spread  
186 and surface area from the fitted polynomial functions. Data from other observers and V1 surface area measurements are  
187 included as Supplementary Information. **C-E.** Perceptual biases for isolated circles (**C**), Delboeuf stimuli (**D**), and the relative  
188 illusion strength (**E**) plotted against pRF spread for each stimulus location and observer. **F-H.** Perceptual biases for isolated  
189 circles (**F**), Delboeuf stimuli (**G**), and the relative illusion strength (**H**) plotted against V1 surface area (as percentage of the  
190 area of the whole cortical hemisphere) for each stimulus location and observer. In **C-I** Symbols denote individual observers.  
191 Elliptic contours denote the Mahalanobis distance from the bivariate mean. The colored, straight lines denote the linear  
192 regression separately for each eccentricity. Colors denote stimuli at 1.96° (orange), 3.92° (grey), or 7.84° (light blue)  
193 eccentricity.

194 The most critical of the above tests of our hypothesis that cortical properties and perception are  
195 linked treated each visual field location as a separate observation. While this includes the between-  
196 subject variance as well as the pattern of differences within each observer, it directly quantifies the  
197 relationship between the two variables. However, the measurements from the four visual field  
198 quadrants for a given observer are naturally not independent. We therefore conducted several  
199 additional tests. We first repeated all of these analyses after subtracting the mean bias/pRF spread  
200 from each observer and eccentricity. This allows analysis of the pattern of results across quadrants  
201 whilst removing both the individual differences between observers (between-subject variance) and  
202 differences related to eccentricity. This analysis confirmed the correlation ( $n=120$ ) between pRF  
203 spread and biases for isolated circles ( $r=0.29$ ,  $p=0.001$ ). For Delboeuf stimuli and the relative illusion  
204 strength the correlations were not significant, though they showed the same trends as the  
205 equivalent correlations in the main analysis (Delboeuf stimuli:  $r=0.15$ ,  $p=0.112$ ; illusion strength:  $r=-$   
206  $0.16$ ,  $p=0.077$ ). We also conducted a similar second-level analysis in which we first calculated the  
207 correlations across the four locations separately in each observer at each eccentricity and then  
208 tested whether the average correlation (after z-transformation) was significantly different from zero.  
209 Finally, we performed a multivariate canonical correlation analysis using the four observations per  
210 observer and eccentricity (see Supplementary Information: Intra-individual differences analysis for  
211 more detail on the different analyses). The results of these additional analyses are shown in Table 1.

212 A similar approach exploiting within-subject correlations has previously been used in the context of  
213 retinotopic mapping data<sup>34,35</sup> and spatial heterogeneity in perceptual function<sup>21</sup>. These studies  
214 suggests that our sample size of 10 observers is likely sufficient. However, to confirm this we also  
215 performed a simulation analysis to quantify the statistical power of our approach. Our main analysis  
216 and the one removing between-subject variance had the greatest sensitivity for detecting a true  
217 effect (with approximate power of 90% for an assumed true correlation of  $r=0.3$ ). This is unsurprising  
218 given the large number of data points in these analyses ( $n=120$ ). However, while all other analyses  
219 produced nominal false positive rates of ~5%, false positives rose slightly to ~9% when removing  
220 between-subject variance. This suggests our main analysis as the optimal statistical test for our  
221 hypothesis, affording high sensitivity and specificity (see Supplementary Information: Power  
222 analysis).

223 Finally, we also analyzed the equivalent correlations between behavioral measures and pRF spread  
224 for areas V2 and V3. Pooled across eccentricities ( $n=120$ ) pRF spreads in either area were  
225 significantly correlated with the biases for isolated circles (V2:  $r=0.4$ ,  $p<0.0001$ ; V3:  $r=0.29$ ,  
226  $p=0.0013$ ). Correlations between pRF spread in these areas and the biases for Delboeuf stimuli

227 followed the same trend but were not significant (V2:  $r=0.14$ ,  $p=0.1188$ ; V3:  $r=0.16$ ,  $p=0.0728$ ).  
 228 Moreover, separated by eccentricity all of these correlations were positive but not significant. Thus  
 229 the relationship between pRF spread and perceptual biases was not specific to V1 but a general  
 230 feature of early visual cortex. This is unsurprising given that pRF spreads in V1 were largely well  
 231 correlated with the extrastriate regions (minimal correlation, separately for each eccentricity ( $n=40$ )  
 232 in V2:  $r=0.49$ ,  $p=0.0014$ ; V3:  $r=0.26$ ,  $p=0.1037$ ).

| Pooled eccentricities               | V1 pRF spread vs                          |                                           |                                             | V1 surface area vs                        |                                           |                                             |
|-------------------------------------|-------------------------------------------|-------------------------------------------|---------------------------------------------|-------------------------------------------|-------------------------------------------|---------------------------------------------|
|                                     | Isolated circles                          | Delboeuf stimuli                          | Illusion index                              | Isolated circles                          | Delboeuf stimuli                          | Illusion index                              |
| <i>Pooled data (main analysis)</i>  | $R = 0.43$ , $p < 0.001$ , $n = 120$      | $R = 0.21$ , $p = 0.022$ , $n = 120$      | $R = -0.22$ , $p = 0.017$ , $n = 120$       | $R = -0.00$ , $p = 0.965$ , $n = 120$     | $R = -0.09$ , $p = 0.315$ , $n = 120$     | $R = -0.06$ , $p = 0.507$ , $n = 120$       |
| <i>Within-subject variance only</i> | $R = 0.29$ , $p = 0.001$ , $n = 120$      | $R = 0.15$ , $p = 0.112$ , $n = 120$      | $R = -0.16$ , $p = 0.077$ , $n = 120$       | $R = 0.21$ , $p = 0.022$ , $n = 120$      | $R = 0.13$ , $p = 0.167$ , $n = 120$      | $R = -0.10$ , $p = 0.254$ , $n = 120$       |
| <i>Second-level analysis</i>        | $R = 0.41$ , $t(29) = 2.81$ , $p = 0.009$ | $R = 0.25$ , $t(29) = 1.54$ , $p = 0.135$ | $R = -0.06$ , $t(29) = -0.37$ , $p = 0.714$ | $R = 0.44$ , $t(29) = 2.63$ , $p = 0.014$ | $R = 0.31$ , $t(29) = 1.97$ , $p = 0.059$ | $R = -0.11$ , $t(29) = -0.73$ , $p = 0.470$ |
| <i>Canonical correlation</i>        | $F(16,67.85) = 2.84$ , $p = 0.001$        | $F(16,67.85) = 2.09$ , $p = 0.019$        | $F(16,67.85) = 1.47$ , $p = 0.139$          | $F(16,67.85) = 1.47$ , $p = 0.137$        | $F(16,67.85) = 1.08$ , $p = 0.393$        | $F(16,67.85) = 0.73$ , $p = 0.756$          |
| <b>1.96° eccentricity</b>           | <b>V1 pRF spread vs</b>                   |                                           |                                             | <b>V1 surface area vs</b>                 |                                           |                                             |
|                                     | Isolated circles                          | Delboeuf stimuli                          | Illusion index                              | Isolated circles                          | Delboeuf stimuli                          | Illusion index                              |
| <i>Pooled data (main analysis)</i>  | $R = 0.48$ , $p = 0.002$ , $n = 40$       | $R = 0.41$ , $p = 0.008$ , $n = 40$       | $R = -0.01$ , $p = 0.963$ , $n = 40$        | $R = 0.46$ , $p = 0.003$ , $n = 40$       | $R = -0.16$ , $p = 0.339$ , $n = 40$      | $R = -0.45$ , $p = 0.004$ , $n = 40$        |
| <i>Within-subject variance only</i> | $R = 0.37$ , $p = 0.018$ , $n = 40$       | $R = 0.19$ , $p = 0.231$ , $n = 40$       | $R = -0.16$ , $p = 0.325$ , $n = 40$        | $R = 0.43$ , $p = 0.005$ , $n = 40$       | $R = 0.38$ , $p = 0.017$ , $n = 40$       | $R = -0.06$ , $p = 0.708$ , $n = 40$        |
| <i>Second-level analysis</i>        | $R = 0.57$ , $t(9) = 1.96$ , $p = 0.082$  | $R = 0.10$ , $t(9) = 0.35$ , $p = 0.735$  | $R = -0.27$ , $t(9) = -0.90$ , $p = 0.391$  | $R = 0.47$ , $t(9) = 2.22$ , $p = 0.054$  | $R = 0.59$ , $t(9) = 2.44$ , $p = 0.037$  | $R = 0.21$ , $t(9) = 0.89$ , $p = 0.395$    |
| <i>Canonical correlation</i>        | $F(16,6.75) = 2.12$ , $p = 0.164$         | $F(16,6.75) = 3.31$ , $p = 0.061$         | $F(16,6.75) = 10.53$ , $p = 0.002$          | $F(16,6.75) = 1.05$ , $p = 0.507$         | $F(16,6.75) = 2.50$ , $p = 0.116$         | $F(16,6.75) = 1.12$ , $p = 0.467$           |
| <b>3.92° eccentricity</b>           | <b>V1 pRF spread vs</b>                   |                                           |                                             | <b>V1 surface area vs</b>                 |                                           |                                             |
|                                     | Isolated circles                          | Delboeuf stimuli                          | Illusion index                              | Isolated circles                          | Delboeuf stimuli                          | Illusion index                              |
| <i>Pooled data (main analysis)</i>  | $R = 0.32$ , $p = 0.046$ , $n = 40$       | $R = 0.48$ , $p = 0.002$ , $n = 40$       | $R = 0.10$ , $p = 0.554$ , $n = 40$         | $R = 0.19$ , $p = 0.248$ , $n = 40$       | $R = -0.07$ , $p = 0.669$ , $n = 40$      | $R = -0.21$ , $p = 0.195$ , $n = 40$        |
| <i>Within-subject variance only</i> | $R = 0.21$ , $p = 0.196$ , $n = 40$       | $R = 0.23$ , $p = 0.146$ , $n = 40$       | $R = -0.02$ , $p = 0.917$ , $n = 40$        | $R = 0.25$ , $p = 0.116$ , $n = 40$       | $R = 0.03$ , $p = 0.847$ , $n = 40$       | $R = -0.22$ , $p = 0.177$ , $n = 40$        |
| <i>Second-level analysis</i>        | $R = 0.41$ , $t(9) = 2.30$ , $p = 0.047$  | $R = 0.40$ , $t(9) = 1.52$ , $p = 0.163$  | $R = 0.11$ , $t(9) = 0.39$ , $p = 0.705$    | $R = 0.47$ , $t(9) = 1.19$ , $p = 0.265$  | $R = 0.17$ , $t(9) = 0.84$ , $p = 0.423$  | $R = -0.39$ , $t(9) = -1.25$ , $p = 0.244$  |
| <i>Canonical correlation</i>        | $F(16,6.75) = 1.41$ , $p = 0.339$         | $F(16,6.75) = 1.77$ , $p = 0.231$         | $F(16,6.75) = 1.05$ , $p = 0.505$           | $F(16,6.75) = 0.61$ , $p = 0.806$         | $F(16,6.75) = 1.71$ , $p = 0.247$         | $F(16,6.75) = 0.51$ , $p = 0.876$           |
| <b>7.84° eccentricity</b>           | <b>V1 pRF spread vs</b>                   |                                           |                                             | <b>V1 surface area vs</b>                 |                                           |                                             |
|                                     | Isolated circles                          | Delboeuf stimuli                          | Illusion index                              | Isolated circles                          | Delboeuf stimuli                          | Illusion index                              |
| <i>Pooled data (main analysis)</i>  | $R = 0.36$ , $p = 0.021$ , $n = 40$       | $R = 0.01$ , $p = 0.957$ , $n = 40$       | $R = -0.33$ , $p = 0.038$ , $n = 40$        | $R = 0.07$ , $p = 0.674$ , $n = 40$       | $R = -0.05$ , $p = 0.740$ , $n = 40$      | $R = -0.10$ , $p = 0.557$ , $n = 40$        |
| <i>Within-subject variance only</i> | $R = 0.29$ , $p = 0.066$ , $n = 40$       | $R = 0.10$ , $p = 0.546$ , $n = 40$       | $R = -0.21$ , $p = 0.203$ , $n = 40$        | $R = 0.09$ , $p = 0.584$ , $n = 40$       | $R = -0.01$ , $p = 0.957$ , $n = 40$      | $R = -0.08$ , $p = 0.618$ , $n = 40$        |
| <i>Second-level analysis</i>        | $R = 0.21$ , $t(9) = 0.78$ , $p = 0.456$  | $R = 0.24$ , $t(9) = 0.76$ , $p = 0.467$  | $R = 0.00$ , $t(9) = 0.01$ , $p = 0.988$    | $R = 0.37$ , $t(9) = 1.46$ , $p = 0.178$  | $R = 0.10$ , $t(9) = 0.30$ , $p = 0.775$  | $R = -0.13$ , $t(9) = -0.76$ , $p = 0.466$  |
| <i>Canonical correlation</i>        | $F(16,6.75) = 3.52$ , $p = 0.052$         | $F(16,6.75) = 2.50$ , $p = 0.116$         | $F(16,6.75) = 2.54$ , $p = 0.112$           | $F(16,6.75) = 2.24$ , $p = 0.146$         | $F(16,6.75) = 1.69$ , $p = 0.252$         | $F(16,6.75) = 0.88$ , $p = 0.609$           |

233

234 **Table 1.** All correlations between pRF spread or cortical surface area in V1 and perceptual bias measures using four  
 235 complementary analysis approaches: *Pooled data* refers to the main analysis presented in which we simply treated each of  
 236 the 12 visual field locations per observer as an separate data point. *Within-subject variance only* refers to the equivalent  
 237 analysis after removing the mean pRF spread, surface area and perceptual bias across the four locations for each  
 238 eccentricity and observer. *Second-level analysis* refers to the analysis in which we first calculated the correlation across  
 239 four locations separately for each observer and eccentricity and then determined whether the average correlation (after z-  
 240 transformation) was different from zero. Both, the average correlation coefficient and the statistics of the t-test against  
 241 zero are shown. *Canonical correlation* corresponds to a standard canonical correlation analysis. This is expressed as an F-  
 242 test. Only the full combination of all four visual field locations per observer and eccentricity are used. Across the table, cells  
 243 shaded in grey denote correlations statistically significant at  $p < 0.05$ .

244 *Basic read-out model of size perception*

245 Why should the apparent size of our circle stimuli be smaller when pRFs are larger? While this result  
 246 is consistent with the simple impoverishment hypothesis, which states that perceptual biases  
 247 depend on the precision of the stimulus representation, this alone does not explain why biases are  
 248 consistent *underestimates* of stimulus size<sup>19</sup>. To understand this better we conducted a series of  
 249 simulations that assume that higher brain regions involved in integrating sensory inputs into a  
 250 perceptual decision about object size read out signals from V1 neurons<sup>36</sup>. We simulated the neuronal  
 251 activity inside the retinotopic map by passing the actual spatial position of the two edges of the  
 252 stimulus through a Gaussian filter bank covering that stimulus location. The stimuli were simulated  
 253 as a binary vector representing 1050 pixels (corresponding to the height of the screen) where the  
 254 edges were set to 1 while the background was set to 0. The filter bank assumed a Gaussian tuning  
 255 curve whose width was parameterized at each pixel along this vector. We calculated the response of  
 256 each filter, to give rise to a population activity profile. Subsequently, a higher level then sampled this  
 257 activity to infer stimulus size. This basic model only assumes two layers – however, it is principally



258 the same if activity is submitted from V1 across multiple stages along the visual hierarchy with each  
259 layer applying similar filtering.

260 With this approach, stimulus size can be inferred from the distance between the activity peaks  
261 corresponding to the two edges (Figure 3). When the spatial tuning of visual neurons (i.e. neuronal  
262 receptive field size) is narrow, the peaks can accurately localize the actual stimulus edges. However,  
263 as tuning width increases, the activity profile becomes blurrier. Critically, the distance between the  
264 two peaks also becomes *smaller* because activity from the two edges is conflated (Figure 3A). It  
265 follows that with wider tuning (at greater eccentricity and larger pRF spread), estimates of the  
266 separation between peaks decreases until eventually the two peaks merge. This scenario  
267 presumably corresponds to far peripheral vision. For the Delboeuf stimuli, the separation of peaks is  
268 greater than that of the actual stimulus edges when tuning width is narrow because activity  
269 corresponding to the inducer and the target blurs together. However, as tuning width increases the  
270 separation also becomes smaller just as for isolated circles (Figure 3B).

271 To quantify the perceptual biases predicted by this model, we simulated perceptual judgments for  
272 both stimulus types and across a range of neuronal tuning widths. The relationship between  
273 increasing tuning width and perceptual biases parallels that between empirically observed  
274 perceptual biases and stimulus eccentricity (Figure 3C). Size estimates at very small receptive fields  
275 (and thus lower eccentricity) are largely accurate but apparent size becomes increasingly smaller  
276 than the physical stimulus as tuning width increases. Estimates for the Delboeuf stimuli are generally  
277 larger than the physical target. However, as tuning width increases estimates again become smaller.  
278 Thus, a large part of the difference in perceptual quality between these two stimulus types may be  
279 simply due to the physical difference between them, and the corresponding representation within a  
280 population of receptive fields, rather than a more complex interaction between the target and the  
281 surrounding annulus. Finally, our *relative* illusion strength is the difference between biases for the  
282 two stimulus types. As tuning width increases, this measure in turn becomes larger, just as it does  
283 for the empirical data in Figure 2D.

284 One caveat to this model is that the magnitude of simulated biases is a lot larger than those we  
285 observed empirically. This may indicate additional processes involved in calibrating the size  
286 judgment. However, it may also be simplistic to infer size from the actual activity peaks. The actual  
287 read-out process may instead calculate a confidence range that accounts for the whole function  
288 describing the activity profile<sup>37</sup>. The exact relationship between pRF spread and neuronal receptive  
289 field size is also unknown. Estimates of pRF spread from fMRI data must aggregate the actual *sizes* of  
290 neuronal receptive fields, but also the *range* of center positions of all the receptive fields in the  
291 voxel, and their *local* positional scatter within this range. In addition, extra-classical receptive field  
292 interactions, response nonlinearities<sup>38</sup>, and non-neuronal factors like hemodynamic effects, fixation  
293 stability, and head motion must also contribute to some extent. While the simulated tuning widths  
294 in our model probably roughly correspond to *neuronal* receptive field size in V1 within our  
295 eccentricity range (see e.g. Figure 9B in ref.<sup>31</sup>), an aggregate of the different factors contributing to  
296 pRF spread may thus be more appropriate. However, at least qualitatively the relationship between  
297 perceptual biases and tuning width parallels the empirical pattern of perceptual biases and pRF  
298 spread estimates that we found.

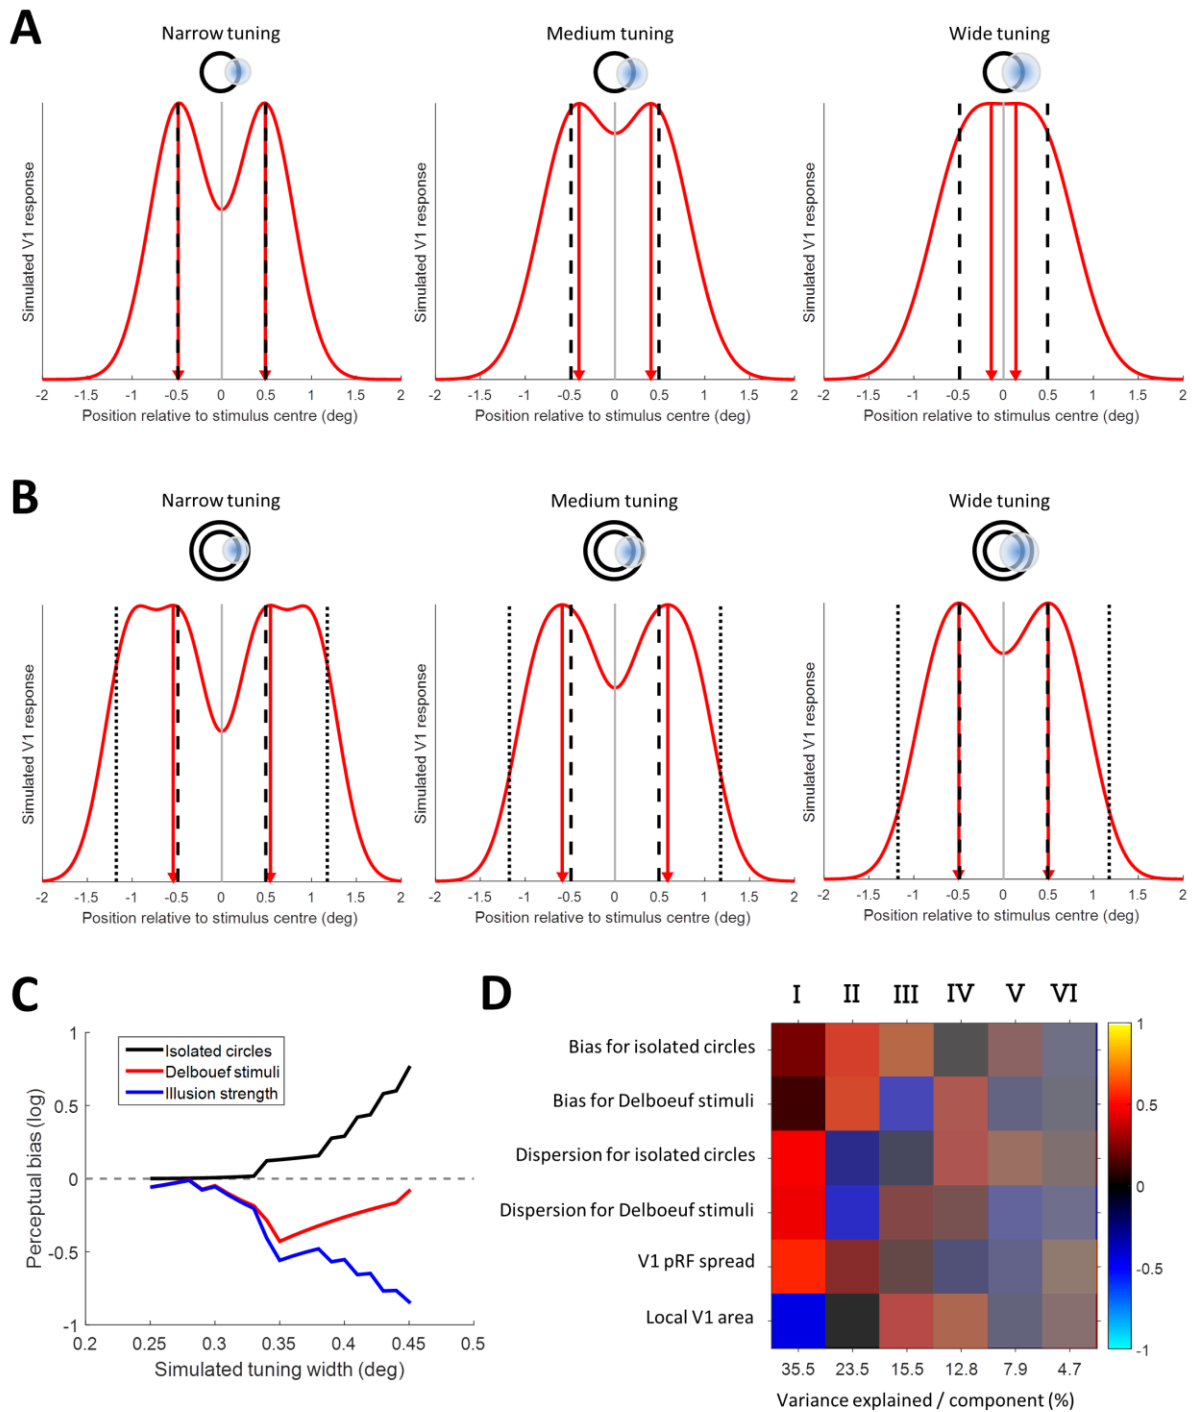

299  
 300 **Figure 3.** Basic read-out model. **A-B.** Simulated activity profiles for isolated circle (**A**) and Delbouef stimuli (**B**) were  
 301 generated by passing the actual location of the stimulus edges through a bank of Gaussian filters covering the stimulus  
 302 locations. The red curves indicate the output of the filter bank as an simulation of stimulus-related population activity in  
 303 V1. The separation between the two peaks is an estimate of stimulus size (red triangles and dashed red lines). The vertical  
 304 black lines denote the actual position of the edges of the target stimulus (dashed) and the inducer annulus in the Delbouef  
 305 stimuli (dotted). Simulated neuronal tuning width increases from left to right. This is also illustrated by the schematic  
 306 diagram above each graph representing the stimulus and an example receptive field. **C.** The simulated perceptual biases  
 307 for the two stimulus types and the relative illusion strength plotting for a range of tuning widths. Black: isolated circles.  
 308 Red: Delbouef stimuli. Blue: Relative illusion strength. See Figure 1D for comparison. **D.** Principal component analysis on a  
 309 data set combining the biases for isolated circles and Delbouef stimuli, their respective dispersions (i.e. discrimination  
 310 acuity), V1 pRF spread, and local V1 surface area (relative to the area of the whole cortical hemisphere). Columns indicate  
 311 the six principal components. The numbers on the x-axis show the percentage of variance explained by each component.

312 Each row is one of the six variables. The color of each cell denotes the sign (red: positive, blue: negative) and magnitude of  
313 how much each variable contributes to each principal component. The saturation denotes the amount of variance  
314 explained by each principal component.

### 315 *Dissociation between basic perceptual bias and contextual illusions*

316 At the smallest eccentricity of 1.96°, raw perceptual biases for isolated circles were correlated with  
317 local V1 area but this pattern was not evident when data were pooled across eccentricity ( $r=-0.0$ ,  
318  $p=0.9649$ ; Figure 2F and Supplementary Figure S4A). With Delboeuf stimuli, raw perceptual biases  
319 (relative to the central reference) did not correlate with local V1 area at any eccentricity ( $r=-0.09$ ,  
320  $p=0.3152$ ; Figure 2G and Supplementary Figure S4B). Because previous research has compared  
321 perception to the macroscopic surface area of the entire central portion of V1<sup>8,9,11-15,17</sup>, we further  
322 calculated the overall surface area of V1, representing each visual field quadrant between an  
323 eccentricity of 1° and 9°. This showed a similar relationship with perceptual biases as local V1 area at  
324 the innermost eccentricity (Supplementary Figure S5; isolated circles:  $r=0.27$ ,  $p=0.0029$ ; Delboeuf  
325 stimuli:  $r=-0.08$ ,  $p=0.3968$ ). These results suggest that the variability in perceptual biases is largely  
326 driven by differences in cortical magnification for the central visual field: For our innermost  
327 eccentricity the relationship between surface area and perceptual measures was always strongest.  
328 This variability in central V1 area may thus dominate measurements of the whole quadrant.  
329 However, the macroscopic surface area should also be a more stable measure than the area of small  
330 local cortical patches. The local surface area and overall area of quadrant maps were very strongly  
331 correlated (area relative to whole cortex:  $r=0.54$ ,  $p<0.0001$ ; absolute surface area:  $r=0.54$ ,  $p<0.0001$ ;  
332 see Supplementary Figure S6 for plots separated by eccentricity). Therefore, the macroscopic V1  
333 surface area is a close proxy for local variations in cortical magnification.

334 In an indirect replication of our earlier findings<sup>8,9,11</sup>, we also observed an inverse relationship  
335 between the *relative* strength of the Delboeuf illusion (the difference in perceptual bias measured  
336 for the two stimulus types) and V1 surface area. Again this was only significant at the smallest  
337 eccentricity and not when data were pooled across eccentricities ( $r=-0.06$ ,  $p=0.5066$ ; Figure 2H and  
338 Supplementary Figure S5C) but it was significant for the overall area of the quadrant map ( $r=-0.28$ ,  
339  $p=0.0017$ ). The relative illusion strength (and thus presumably the Delboeuf illusion itself) is the  
340 *difference* in apparent size between these stimuli at the *same location*. This measure could be  
341 partially independent of pRF spread as it may instead be related to long-range horizontal  
342 connections that exceed the voxel size and that mediate the contextual interaction between target  
343 and surround.

344 Under the hypothesis that surface area predicts illusion strength, the bias induced by the illusion  
345 differs mechanistically from basic perceptual biases. Both isolated circles (Figure 2C) and Delboeuf  
346 stimuli (Figure 2D) were perceived as smaller when pRFs were larger. However, *at the same location*  
347 Delboeuf stimuli were nonetheless seen as larger than isolated circles. Even though the apparent  
348 size of both isolated circles and Delboeuf stimuli was linked to pRF spread – consistent with the basic  
349 read-out model – the *difference* between these biases was also modestly correlated with the area of  
350 central V1. The illusion effect may be modulated by cortical distance, possibly via lateral intra-  
351 cortical connections<sup>1,10</sup>, rather than pRF spread. We conjectured previously that the illusion could  
352 arise due to long-range connectivity between V1 neurons encoding the target circle and the  
353 surrounding context. Thus the illusion may be weaker when V1 surface area (and thus cortical  
354 distance) is larger<sup>8-11</sup>. In contrast, basic perceptual biases for any stimulus seem to be linked to the

355 coarseness (pRF spread) of the retinotopic stimulus representation itself, which relates to neuronal  
356 receptive field sizes and their local positional scatter.

357 This interpretation may seem to contradict previous findings that pRF spread is inversely related to  
358 V1 surface area<sup>17,35</sup>. However, there is considerable additional unexplained variance to this  
359 relationship. To further disentangle the potential underlying factors, we conducted a principal  
360 component analysis on a multivariate data set, including z-standardized raw biases for isolated  
361 circles and Delboeuf stimuli, the respective dispersions of these distributions (as an indicator of  
362 discrimination thresholds), and pRF spread estimates as well as local surface area at corresponding  
363 locations in V1. The first four components explained over 87% of the variance (Figure 3D). The first  
364 component suggests a positive relationship between pRF spread and dispersion and a negative  
365 relationship with V1 area. This supports earlier findings linking pRF spread and cortical magnification  
366 to acuity<sup>16,17</sup>. There is however little relation between these measures and perceptual biases. The  
367 second component shows a positive relationship between biases for both stimulus types and pRF  
368 spread, which reflects our present results (Figure 2C-D). In contrast, the third component involves a  
369 negative correlation between biases for the two stimulus types and a positive link between raw  
370 biases for isolated circles and V1 area. This may explain the negative correlation between relative  
371 illusion strength and V1 area (Supplementary Figure S4C). The fourth component involves a positive  
372 link between dispersion for isolated circles and biases for Delboeuf stimuli and also with V1 area.  
373 This resembles our earlier findings for orientation processing that also suggest a link between  
374 discrimination thresholds for isolated grating stimuli, the strength of the contextual tilt illusion, and  
375 V1 surface area<sup>11</sup>.

376 Taken together, these results indicate that different mechanisms influence apparent size: both  
377 isolated circles and Delboeuf stimuli generally appear smaller (relative to the central reference)  
378 when pRFs are large, as predicted by the read-out model. However, variability in cortical surface  
379 area (and thus the scale required of intra-cortical connections) also seems to be an important factor  
380 in the illusory modulation of apparent size. Because our task estimates perceptual biases under  
381 either condition relative to a *constant* reference, it was uniquely suited to reveal dissociations  
382 between these effects. A more traditional task in which reference stimuli are presented at matched  
383 locations/eccentricities would be insensitive to this difference.

#### 384 *Heterogeneity in perceptual biases has central origin*

385 Naturally, the spatial heterogeneity in perceptual biases could possibly arise from factors prior to  
386 visual cortical processing, like small corneal aberrations, inhomogeneity in retinal organization, or  
387 the morphology of retinotopic maps in the lateral geniculate nucleus. We tested this possibility in a  
388 behavioral control experiment in which we measured perceptual biases while we presented the  
389 stimuli either binocularly or dichoptically to the left and right eye. There was a close correspondence  
390 between biases measured with either eye ( $r=0.51$ ,  $p=0.0103$ ; Figure 4). Thus at least a large part of  
391 the variance in perceptual biases must arise at a higher stage of visual processing where the input  
392 from both eyes has converged, such as the binocular cells in V1.



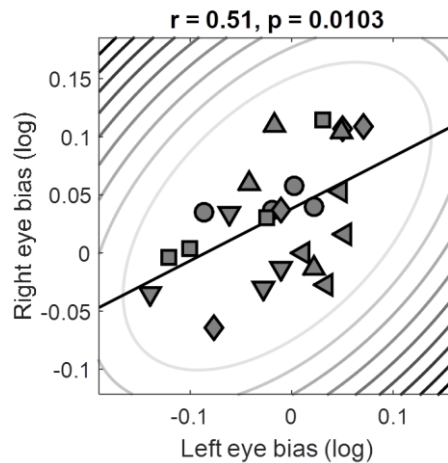

393

394 **Figure 4.** Perceptual biases measured under dichoptic presentation. Biases measured with stimuli in the left eye plotted  
395 against those measured in the right eye. Symbols denote individual observers. Elliptic contours denote the Mahalanobis  
396 distance from the bivariate mean. The straight, black lines denote the linear regression.

397

## 398 Discussion

399 Our experiments show that when the spatial tuning of neuronal populations in V1 is coarse, visual  
400 objects are experienced as *smaller*. These findings support the hypothesis that object size is inferred  
401 by decision-making processes from the retinotopic representations in V1<sup>1</sup> and possibly other early  
402 visual regions. Our results are therefore consistent with previous reports of a neural signature of  
403 apparent size in V1 responses<sup>2-7</sup>. Here we demonstrate that raw perceptual biases are correlated  
404 with spatial tuning of neuronal populations in V1. This provides strong evidence that the  
405 representation in early visual cortex is indeed used for perceptual decisions about stimulus size,  
406 because the biases we observed were independent from contextual or top-down modulation of  
407 early visual cortex. Considering that perceptual biases correlate with cortical measures acquired a  
408 year later and under completely independent conditions (MRI scanner vs behavioral testing room)  
409 we posit that this link between cortical measures and perception is a stable feature of the human  
410 visual system.

411 We have formulated a basic read-out model that samples the activity in early retinotopic maps to  
412 infer stimulus size. This model predicts the relationship we observed between eccentricity, pRF  
413 spread, and raw perceptual biases measured behaviorally. This was true both for simple, isolated  
414 circle stimuli and the Delboeuf stimuli in which the target was surrounded by an annulus. Taking  
415 advantage of our unique task design, we further demonstrate that processes related to basic  
416 perceptual biases are dissociable from contextual effects, like the Delboeuf illusion: While raw  
417 perceptual biases of object size are explained by pRF spread, the local surface area (a measure of  
418 cortical distance) of at least the part of V1 representing the very central visual field also explains  
419 some variance in contextual modulation of apparent size in these illusions. This underlines the need  
420 for a greater understanding of how cortical distance relates to pRF spread. Note however that we  
421 only calculated the *relative* strength of the Delboeuf illusion based on the biases measured for the  
422 two stimulus types, isolated circles and the contextual stimulus including an annulus. It is possible  
423 that this prediction does not fully account for the illusion strength one would measure in more  
424 standard procedures.

425 An alternative explanation to our read-out model is that higher-level decoding mechanisms  
426 misestimate the size of the stimulus because they are inadequately calibrated to idiosyncratic  
427 differences in cortical magnification<sup>20</sup>. This would cause a residual error between the grossly  
428 calibrated read-out that may be reflected in perceptual judgments. This explanation however does  
429 not explain why perceptual biases are consistently *reductions* in apparent size. In contrast, our basic  
430 read-out model fully accounts for this pattern of results. However, we do not wish to rule out the  
431 calibration error hypothesis entirely and in fact a hybrid of the two is certainly possible. In particular,  
432 in foveal vision, where individual differences in cortical magnification are far more pronounced<sup>32</sup>,  
433 calibration errors are likely. Moreover, the perceptual biases predicted by our basic model are  
434 considerably larger than those we observed empirically (even though the relationship with  
435 eccentricity parallels the observed data). This finding is consistent with a calibration mechanism that  
436 compensates for the incorrect estimation based on basic read-out of the activity in V1.

437 Naturally, absence of evidence is not evidence of absence. It is entirely possible that some  
438 modulations of apparent size are mediated solely by higher-level brain regions but are not  
439 represented in early visual cortex. These higher-level areas are of course likely to be involved even in  
440 our experiments. Nonetheless, differences in stimulus representations caused by idiosyncratic  
441 spatial tuning should be inherited by areas downstream the visual hierarchy, such as V2 and V3. In  
442 fact, we observed similar correlations between perceptual biases and pRF spread in V2 and V3. This  
443 is unsurprising given the pRF spreads across these early visual areas are also strongly correlated  
444 (though interestingly the surface areas of these regions are far less linked<sup>34</sup>). Therefore signals in  
445 these regions may also be used for perceptual judgments. However, V1 would be a natural candidate  
446 for size estimates given it is the region with the smallest receptive fields and thus the finest spatial  
447 resolution. Future research must explore the neural substrate of size judgments, in particular with  
448 regard to where in the brain the sensory input is integrated into a perceptual decision<sup>1</sup>. Interestingly,  
449 topographically organized tuning for visual object size has recently been reported in parietal  
450 cortex<sup>39</sup>. Brain stimulation techniques may help to understand the causal link between early visual  
451 cortex and higher decision-making centers.

452 Our present findings imply that measurements of functional architecture in early sensory cortex can  
453 predict individual differences not only of objective discrimination abilities but also our subjective  
454 experience of the world. Theoretically, the principle discovered here should also apply to other  
455 sensory modalities, such as tuning for auditory frequency or tactile position, and may generalize to  
456 more complex forms of tuning, such as object identity or numerosity<sup>40</sup>.

457

## 458 **Acknowledgements**

459 This research was supported by an ERC Starting Grant (310829) to DSS, a Research Fellowship by the  
460 Deutsche Forschungsgemeinschaft (Ha 7574/1-1) to BdH, a UCL Graduate School Bridging Fund and  
461 a Wellcome Trust Institutional Strategic Support Fund to CM, and a UK MRC Career Development  
462 Award (MR/K024817/1) to JAG.

463

464

465

## 466 **Methods**

### 467 Observers

468 The authors and several naïve observers participated in these experiments. All observers were  
469 healthy and had normal or corrected-to-normal visual acuity. All observers gave written informed  
470 consent and procedures were approved by the UCL Research Ethics Committee.

471 Ten observers (4 authors; 3 female; 2 left-handed; ages 24-37) took part in both the first behavioral  
472 experiment measuring perceptual biases at 3 eccentricities and in the fMRI retinotopic mapping  
473 experiment (henceforth, *size eccentricity bias* experiment). An additional 3 observers (1 female; all  
474 right-handed; ages 20-25) took part in behavioral experiments only but could not be recruited for  
475 the fMRI sessions (which commenced several months later and were conducted over the course of a  
476 year). These fMRI data form also part of a different study investigating the inter-session reliability of  
477 pRF analysis that we are preparing for a separate publication. Nine of the observers from the size  
478 eccentricity bias experiment (3 authors; 3 female; 1 left-handed; ages 25-37 at second test) took part  
479 in an additional behavioral experiment approximately one year after the first measuring perceptual  
480 biases in size perception (*long-term bias reliability*). Four observers (4 authors, 1 female, all right-  
481 handed; ages 33-38) participated in another experiment two years after the main experiment to  
482 again assess the reliability of bias estimates and also test a greater range of eccentricities (*size far*  
483 *eccentricity bias*). Six observers (5 authors; 2 female; all right-handed; ages 21-36) participated in the  
484 dichoptic control experiment (*dichoptic bias*).

### 485 General psychophysical procedure

486 Observers were seated in a dark, noise-shielded room in front of a computer screen (Samsung  
487 2233RZ) using its native resolution of 1680 x 1050 pixels and a refresh rate of 120Hz. Minimum and  
488 maximum luminance values were 0.25 and 230cd/m<sup>2</sup>. Head position was held at 48cm from the  
489 screen with a chinrest. Observers used both hands to indicate responses by pressing buttons on a  
490 keyboard.

491 The dichoptic control experiment took place in a different testing room, using an Asus VG278 27"  
492 LCD monitor running its native resolution of 1920 x 1080 pixels and a refresh rate of 120Hz.  
493 Minimum and maximum luminance values were 0.16 and 100cd/m<sup>2</sup>, with a viewing distance of 60  
494 cm ensured with a chinrest. To produce dichoptic stimulation observers wore nVidia 3D Vision 2  
495 shutter goggles synchronized with the refresh rate of the monitor. Frames for left and right eye  
496 stimulation thus alternated at 120Hz.

### 497 Multiple Alternatives Perceptual Search (MAPS) procedure

498 To estimate perceptual biases efficiently at four visual field locations we developed the MAPS  
499 procedure. This is a matching paradigm using analyses related to reverse correlation or classification  
500 image approaches<sup>22,23</sup> that seeks to directly estimate the points of subjective equality, whilst also  
501 allowing an inference of discrimination ability.

### 502 *Stimuli*

503 All stimuli were generated and displayed using MATLAB (The MathWorks Inc., Natick, MA) and the  
504 Psychophysics Toolbox version 3<sup>41</sup>. The stimuli in all the size discrimination experiments comprised  
505 light grey (54cd/m<sup>2</sup>) circle outlines presented on a black background. Each stimulus array consisted

506 of five circles (Figure 1B). One, the *reference*, was presented in the center of the screen and was  
507 always constant in size (diameter:  $0.98^\circ$  visual angle). The remaining four, the *targets*, varied in size  
508 from trial to trial and independently from each other. They were presented at the four diagonal  
509 polar angles and at a distance of  $3.92^\circ$  visual angle from the reference, except for the size  
510 eccentricity bias experiment where target eccentricity could be  $1.96^\circ$ ,  $3.92^\circ$ , or  $7.84^\circ$  visual angle and  
511 the size far eccentricity bias experiment where there were two additional eccentricities in the  
512 periphery ( $11.76^\circ$  and  $15.68^\circ$ ). To measure the bias under the Delboeuf illusion, a larger inducer  
513 circle (diameter:  $2.35^\circ$ ) surrounded each of the four target circles (but not the reference) to produce  
514 a contextual modulation of apparent size.

515 In all experiments, the independent variable (the stimulus dimension used to manipulate each of the  
516 targets) was the binary logarithm of the ratio of diameters for the target relative to the reference  
517 circles. In the size eccentricity bias experiment only, the sizes of the four targets were drawn without  
518 replacement from a set of fixed sizes ( $0, \pm 0.05, \pm 0.1, \pm 0.15, \pm 0.2, \pm 0.25, \pm 0.5, \pm 0.75$ , or  $\pm 1$  log units).  
519 Thus, frequently there was no “correct” target to choose from. Because this made the task feel quite  
520 difficult for many observers, in subsequent experiments (long-term reliability and dichoptic bias) we  
521 decided to select a random subset of three targets from a Gaussian noise distribution centered on 0  
522 (the size/orientation of the reference) while one target was correct, i.e. it was set to 0. The standard  
523 deviation of the Gaussian noise was 0.3 log units for size discrimination experiments.

#### 524 *Tasks*

525 Each trial started with 500ms during which only a fixation dot (diameter:  $0.2^\circ$ ) was visible in the  
526 middle of the screen. This was followed by presentation of the stimulus array for 200ms after which  
527 the screen returned to the fixation-only screen. Observers were instructed to make their response  
528 by pressing the F, V, K, or M button on the keyboard corresponding to which of the four targets  
529 appeared most similar to the reference. After their response a “ripple” effect over the target they  
530 had chosen provided feedback about their response. In the size discrimination experiments this  
531 constituted three 50ms frames in which a circle increased in diameter from  $0.49^\circ$  in steps of  $0.33^\circ$   
532 and in luminance.

533 Moreover, the color of the fixation dot also changed during these 150ms to provide feedback about  
534 whether the behavioral response was correct. In the size eccentricity bias experiment, the color was  
535 green and slightly larger ( $0.33^\circ$ ) for correct trials and red for incorrect trials. In all later experiments,  
536 we only provided feedback on *correct* trials. This helped to reduce the anxiety associated with large  
537 numbers of incorrect trials that are common in this task: Accuracy was typically around 45-50%  
538 correct. Even though this is well in excess of chance performance of 25% it means that observers  
539 would frequently make mistakes. See Supplementary Information for further details on the task  
540 procedure.

541 Experimental runs were broken up into blocks of 20 trials. After each block there was a resting  
542 break. A message on the screen reminded observers of the task and indicated how many blocks they  
543 had already completed. Observers initiated blocks with a button press.

544 *Size eccentricity bias experiment:* Observers were recruited for two sessions on separate days. In  
545 each session they performed six experimental runs, three with only circles and three with the  
546 Delboeuf stimuli. Each run tested one of the three target eccentricities. Trials with different  
547 eccentricities were run in separate blocks to avoid confounding these measurements with



548 differences in attentional deployment across different eccentricities. There were 10 blocks per  
549 experimental run. In the *size far eccentricity bias* experiment we only tested observers in one session  
550 on the five target eccentricities.

551 *Long-term bias reliability experiment:* Half of the experimental runs observers performed measured  
552 their baseline biases. The other half of the runs contained artificially induced biases: two of the four  
553 targets were altered subtly: one by adding and one by subtracting 0.1 log units. Which two targets  
554 were altered was counterbalanced across observers, as was the order of experimental runs.  
555 Observers were recruited for only one session comprising four runs (two with artificial bias) plus an  
556 additional run measuring biases for the Delboeuf stimuli. There were 10 blocks per experimental  
557 run. Only the results of the baseline biases (i.e. without artificially induced bias) are presented in the  
558 present study. The remainder of these experiments form part of another study and will be presented  
559 elsewhere.

560 *Dichoptic bias experiment:* There were three experimental conditions in this experiment. By means  
561 of shutter goggles the stimulus arrays could be presented dichoptically, either binocularly or  
562 monocularly to either eye. To aid stereoscopic fusion we additionally added 5 concentric squares  
563 surrounding the stimulus arrays (side length: 8.1-10.5° in equal steps). The three experimental  
564 conditions were randomly interleaved within each experimental run. There were 34 blocks per run;  
565 however, in this experiment each block comprised only 12 trials. Observers performed two such runs  
566 within a single session.

#### 567 *Analysis*

568 To estimate perceptual biases we fit a model to predict a given observer's behavioral response in  
569 each trial (Figure 1C). For each target stimulus location a Gaussian tuning curve denoted the output  
570 of a "neural detector". The detector producing the strongest output determined the predicted  
571 choice. The model fitted the peak location ( $\mu$ ) and dispersion ( $\sigma$ ) parameters of the Gaussian tuning  
572 curves that minimized the prediction error across all trials. Model fitting employed the Nelder-Mead  
573 simplex search optimization procedure<sup>42</sup>. We initialized the  $\mu$  parameter as the mean stimulus value  
574 (offset in logarithmic size ratio from 0) whenever a given target location was chosen *incorrectly*. We  
575 initialized the  $\sigma$  parameter as the standard deviation across all stimulus values when a given target  
576 location was chosen. The final model fitting procedure however always used *all* trials, correct and  
577 incorrect.

#### 578 Retinotopic mapping experiment

579 The same ten observers from the size eccentricity bias experiment participated in two sessions of  
580 retinotopic mapping in a Siemens Avanto 1.5T MRI scanner using a 32-channel head coil located at  
581 the Birkbeck-UCL Centre for Neuroimaging. The front half of the coil was removed to allow  
582 unrestricted field of view leaving 20 channels. Observers lay supine and watched the mapping  
583 stimuli, which were projected onto a screen (resolution: 1920 x 1080) at the back of the bore, via a  
584 mirror mounted on the head coil. The viewing distance was 68cm.

585 We used a T2\*-weighted multiband 2D echo-planar sequence<sup>43</sup> to acquire 235 functional volumes  
586 per pRF mapping run and 310 volumes for a run to estimate the hemodynamic response function  
587 (HRF). In addition, we collected a T1-weighted anatomical magnetization-prepared rapid acquisition

588 with gradient echo (MPRAGE) scan with 1 mm isotropic voxels (TR=2730ms, TE=3.57ms) using the  
589 full 32-channel head coil.

590 The method we used for analyzing pRF<sup>31</sup> data has been described previously<sup>32,33</sup>. We used a  
591 combined wedge and ring stimulus that contained natural images that changed twice a second (see  
592 Supplementary Information for further details on the design of the mapping experiments). The  
593 MATLAB toolbox (available at <http://dx.doi.org/10.6084/m9.figshare.1344765>) models the pRF of  
594 each voxel as a two-dimensional Gaussian in visual space and incorporates the hemodynamic  
595 response function measured for each individual observer. It determines the visual field location (x  
596 and y in Cartesian coordinates) and the spread (standard deviation) of the pRF plus an overall  
597 response amplitude.

#### 598 *Stimuli and task*

599 A polar wedge subtending a polar angle of 12° rotated in 60 discrete steps (one per second) around  
600 the fixation dot (diameter: 0.13° surrounded by a 0.25° annulus where contrast ramped up linearly).  
601 A ring expanded or contracted, both in width and overall diameter, in 36 logarithmic steps. The  
602 maximal eccentricity of the wedge and ring was 8.5°. There were 3 cycles of wedge rotation and 5  
603 cycles of ring expansion/contraction. Each mapping run concluded with 45s of a fixation-only period.  
604 At all times a low contrast 'radar screen' pattern (Figure 2A) was superimposed on the screen to aid  
605 fixation compliance.

606 The wedge and ring parts contained colorful natural images (Figure 2A) from Google Image search,  
607 which changed every 500ms. They depicted outdoor scenes (tropical beaches, forests, mountains,  
608 and rural landscapes), faces, various animals, and pictures of written script (228 images in total). One  
609 picture depicted the 'Modern Anderson' clan tartan. These pictures were always rotated in  
610 accordance with the current orientation of the wedge. Observers were asked to fixate a fixation dot  
611 at all times. With a probability of 0.03 every 200ms the black fixation dot would change color for  
612 200ms to one of the primary and complementary colors or white followed by another 200ms of  
613 black. Observers were asked to tap their finger when the dot turned red. To also maintain attention  
614 on the mapping stimulus they were asked to tap their finger whenever they saw the tartan image.

615 In alternating runs the wedge rotated in clockwise and counterclockwise directions, while the ring  
616 expanded and contracted, respectively. In each session we collected six such mapping runs and an  
617 additional run to estimate the hemodynamic response function. The latter contained 10 trials each  
618 of which started with a 2s sequence of four natural images from the same set used for mapping.  
619 These were presented in a circular aperture centered on fixation with radius 8.5° visual angle. This  
620 was followed by 28s of the blank screen (fixation and radar screen only).

#### 621 *Preprocessing and pRF modeling*

622 Functional MRI data were first preprocessed using SPM8 (Wellcome Trust Centre for Neuroimaging,  
623 London, <http://www.fil.ion.ucl.ac.uk/spm/software/spm8>). The first 10 volumes were removed to  
624 allow the signal to reach equilibrium. We performed intensity bias correction, realignment and  
625 unwarping, and coregistration of the functional data to the structural scan, all using default  
626 parameters. We used FreeSurfer (<https://surfer.nmr.mgh.harvard.edu/fswiki>) for automatic  
627 segmentation and reconstruction to create a three-dimensional inflated model of the cortical  
628 surfaces for the grey-white matter boundary and the pial surface, respectively<sup>44,45</sup>. We then

629 projected the functional data to the cortical surface by finding for each vertex in the surface mesh  
630 the median position between the grey-white matter and pial surfaces in the functional volume. All  
631 further analyses were performed in surface space.

632 We applied linear detrending to the time series from each vertex in each run and then z-  
633 standardized them. Alternating pRF mapping runs (i.e. those sharing the same stimulus directions –  
634 clockwise/expanding and counterclockwise/contracting) were averaged. These two average runs  
635 were then concatenated. We further divided the HRF run into the 10 epochs and averaged them.  
636 Only vertexes for which the average response minus the standard error in the first half of the trial  
637 was larger than zero were included. The HRFs for these vertices were then averaged and we fit a  
638 two-gamma function with four free parameters: the amplitude, the peak latency, the undershoot  
639 latency, and the ratio amplitude between peak and undershoot.

640 Population receptive field analysis was conducted in a two-stage procedure. First, a coarse fit was  
641 performed on data smoothed with a large kernel on the spherical surface (FWHM=5mm). We  
642 performed an extensive grid search on every permutation of 15 plausible values for x and y,  
643 respectively, and a range of pRF spreads from 0.18° to 17° in 34 logarithmic steps (0.2 in binary  
644 logarithm). For each permutation we generated a predicted time series by calculating the overlap  
645 between a two-dimensional Gaussian pRF profile and a binary aperture of the mapping stimulus for  
646 every volume. This time series was then z-standardized and convolved with the subject-specific HRF.  
647 The grid search is a very fast operation that computes the set of three pRF parameters that produce  
648 the maximal Pearson correlation between the predicted and observed time series for the whole set  
649 of search grid parameters and all vertices. This was followed by the slow fine fit. Here we used the  
650 parameters identified by the coarse fit to seed an optimization algorithm<sup>42,46</sup> on a vertex by vertex  
651 basis to refine the parameter estimates by minimizing the squared residuals between the predicted  
652 and observed time series. This stage used the unsmoothed functional data and also included a  
653 fourth amplitude parameter to estimate response strength. Finally, the estimates parameter maps  
654 were also smoothed on the spherical surface with a modest kernel (FWHM=3mm).

#### 655 *Analysis of functional cortical architecture*

656 We next delineated the early visual regions (specifically V1) manually based on reversals in the polar  
657 angle map and the extent of the activated portion of visual cortex along the anterior-posterior axis.  
658 We then extracted the pRF parameter data separately from each visual field quadrant represented  
659 in V1. Data were divided into eccentricity bands 1° in width starting from 1° eccentricity up to 9°. For  
660 each eccentricity band we then calculated mean pRF spread and the sum of surface area estimates.  
661 For pRF spread we used the raw, unsmoothed pRF spread estimates produced by our fine-fitting  
662 procedure. However, the quantification of surface area requires a smooth gradient in the  
663 eccentricity map without any gaps in the map and with minimal position scatter in pRF positions.  
664 Therefore, we used the final smoothed parameter maps for this analysis. The results for pRF spread  
665 are very consistent when using smoothed parameter maps but we reasoned that unsmoothed data  
666 make fewer assumptions.

667 To extract the parameters for each stimulus location we fit polynomial functions to the relationship  
668 between these binned parameters and eccentricity. For pRF spread we used a first order polynomial  
669 (i.e. a linear relationship). For surface area we used a second order polynomial. We then  
670 interpolated each person's pRF spread/surface area at the 12 target locations in the behavioral

671 experiments (that is, 4 stimulus locations and 3 eccentricities. Individual plots for each observer and  
672 visual field quadrant are included in the Supplementary Information. We also quantified the  
673 macroscopic surface area of each *visual field quadrant* in V1 by summing the surface area between  
674 1° and 9°. This range ensured that artifactual, noisy estimates in the foveal confluence or edge  
675 effects well beyond the stimulated region did not introduce spurious differences between  
676 individuals. In our main analyses we normalized all surface area measures relative to the whole  
677 cortical surface area. However, results are also very consistent for using the square root of the  
678 absolute surface area for this analysis.

679

## 680 **Data and materials**

681 Materials and behavioral data: <http://dx.doi.org/10.6084/m9.figshare.1579442>

682 Processed pRF data per observer: <http://dx.doi.org/10.5281/zenodo.19150>

683

## 684 **References**

- 685 1. Schwarzkopf, D. S. Where Is Size in the Brain of the Beholder? *Multisensory Res.* **28**,  
686 285–296 (2015).
- 687 2. Murray, S. O., Boyaci, H. & Kersten, D. The representation of perceived angular size in  
688 human primary visual cortex. *Nat. Neurosci.* **9**, 429–434 (2006).
- 689 3. Fang, F., Boyaci, H., Kersten, D. & Murray, S. O. Attention-dependent representation of a  
690 size illusion in human V1. *Curr. Biol.* **18**, 1707–1712 (2008).
- 691 4. Sperandio, I., Chouinard, P. A. & Goodale, M. A. Retinotopic activity in V1 reflects the  
692 perceived and not the retinal size of an afterimage. *Nat. Neurosci.* **15**, 540–542 (2012).
- 693 5. Pooresmaeili, A., Arrighi, R., Biagi, L. & Morrone, M. C. Blood Oxygen Level-Dependent  
694 Activation of the Primary Visual Cortex Predicts Size Adaptation Illusion. *J. Neurosci.* **33**,  
695 15999–16008 (2013).
- 696 6. Ni, A. M., Murray, S. O. & Horwitz, G. D. Object-Centered Shifts of Receptive Field  
697 Positions in Monkey Primary Visual Cortex. *Curr. Biol. CB* (2014).  
698 doi:10.1016/j.cub.2014.06.003
- 699 7. He, D., Mo, C., Wang, Y. & Fang, F. Position shifts of fMRI-based population receptive  
700 fields in human visual cortex induced by Ponzo illusion. *Exp. Brain Res.* (2015).  
701 doi:10.1007/s00221-015-4425-3
- 702 8. Schwarzkopf, D. S., Song, C. & Rees, G. The surface area of human V1 predicts the  
703 subjective experience of object size. *Nat. Neurosci.* **14**, 28–30 (2011).
- 704 9. Schwarzkopf, D. S. & Rees, G. Subjective size perception depends on central visual  
705 cortical magnification in human v1. *PLoS One* **8**, e60550 (2013).
- 706 10. Song, C. *et al.* Effective connectivity within human primary visual cortex predicts  
707 interindividual diversity in illusory perception. *J. Neurosci. Off. J. Soc. Neurosci.* **33**,  
708 18781–18791 (2013).



- 709 11. Song, C., Schwarzkopf, D. S. & Rees, G. Variability in visual cortex size reflects tradeoff  
710 between local orientation sensitivity and global orientation modulation. *Nat. Commun.*  
711 **4**, 2201 (2013).
- 712 12. Genç, E., Bergmann, J., Singer, W. & Kohler, A. Surface Area of Early Visual Cortex  
713 Predicts Individual Speed of Traveling Waves During Binocular Rivalry. *Cereb. Cortex N.*  
714 *Y. N 1991* (2014). doi:10.1093/cercor/bht342
- 715 13. Verghese, A., Kolbe, S. C., Anderson, A. J., Egan, G. F. & Vidyasagar, T. R. Functional size  
716 of human visual area V1: A neural correlate of top-down attention. *NeuroImage* (2014).  
717 doi:10.1016/j.neuroimage.2014.02.023
- 718 14. Bergmann, J., Genç, E., Kohler, A., Singer, W. & Pearson, J. Neural Anatomy of Primary  
719 Visual Cortex Limits Visual Working Memory. *Cereb. Cortex N. Y. N 1991* (2014).  
720 doi:10.1093/cercor/bhu168
- 721 15. Bergmann, J., Genç, E., Kohler, A., Singer, W. & Pearson, J. Smaller Primary Visual Cortex  
722 Is Associated with Stronger, but Less Precise Mental Imagery. *Cereb. Cortex* bhv186  
723 (2015). doi:10.1093/cercor/bhv186
- 724 16. Duncan, R. O. & Boynton, G. M. Cortical magnification within human primary visual  
725 cortex correlates with acuity thresholds. *Neuron* **38**, 659–671 (2003).
- 726 17. Song, C., Schwarzkopf, D. S., Kanai, R. & Rees, G. Neural Population Tuning Links Visual  
727 Cortical Anatomy to Human Visual Perception. *Neuron* (2015).  
728 doi:10.1016/j.neuron.2014.12.041
- 729 18. Helmholtz, H. *Handbuch der Physiologischen Optik*. (1867).
- 730 19. Newsome, L. R. Visual angle and apparent size of objects in peripheral vision. *Percept.*  
731 *Psychophys.* **12**, 300–304 (1972).
- 732 20. Anstis, S. Picturing peripheral acuity. *Perception* **27**, 817–825 (1998).
- 733 21. Afraz, A., Pashkam, M. V. & Cavanagh, P. Spatial heterogeneity in the perception of face  
734 and form attributes. *Curr. Biol. CB* **20**, 2112–2116 (2010).
- 735 22. Abbey, C. K. & Eckstein, M. P. Classification image analysis: estimation and statistical  
736 inference for two-alternative forced-choice experiments. *J. Vis.* **2**, 66–78 (2002).
- 737 23. Li, R. W., Levi, D. M. & Klein, S. A. Perceptual learning improves efficiency by re-tuning  
738 the decision ‘template’ for position discrimination. *Nat. Neurosci.* **7**, 178–183 (2004).
- 739 24. Morgan, M., Dillenburger, B., Raphael, S. & Solomon, J. A. Observers can voluntarily shift  
740 their psychometric functions without losing sensitivity. *Atten. Percept. Psychophys.* **74**,  
741 185–193 (2012).
- 742 25. Morgan, M. J., Melmoth, D. & Solomon, J. A. Linking hypotheses underlying Class A and  
743 Class B methods. *Vis. Neurosci.* **30**, 197–206 (2013).
- 744 26. Jogan, M. & Stocker, A. A. A new two-alternative forced choice method for the unbiased  
745 characterization of perceptual bias and discriminability. *J. Vis.* **14**, 20 (2014).
- 746 27. Bedell, H. E. & Johnson, C. A. The perceived size of targets in the peripheral and central  
747 visual fields. *Ophthalmic Physiol. Opt. J. Br. Coll. Ophthalmic Opt. Optom.* **4**, 123–131  
748 (1984).

- 749 28. Delboeuf, J. Sur une nouvelle illusion d'optique. *Acad. R. Sci. Lett. B.-arts Belg.*  
750 *Bull.* **24**, 545–558 (1892).
- 751 29. Abrams, J., Nizam, A. & Carrasco, M. Isoeccentric locations are not equivalent: the  
752 extent of the vertical meridian asymmetry. *Vision Res.* **52**, 70–78 (2012).
- 753 30. Rubin, N., Nakayama, K. & Shapley, R. Enhanced perception of illusory contours in the  
754 lower versus upper visual hemifields. *Science* **271**, 651–653 (1996).
- 755 31. Dumoulin, S. O. & Wandell, B. A. Population receptive field estimates in human visual  
756 cortex. *NeuroImage* **39**, 647–660 (2008).
- 757 32. Schwarzkopf, D. S., Anderson, E. J., Haas, B. de, White, S. J. & Rees, G. Larger Extrastriate  
758 Population Receptive Fields in Autism Spectrum Disorders. *J. Neurosci.* **34**, 2713–2724  
759 (2014).
- 760 33. Alvarez, I., De Haas, B. A., Clark, C. A., Rees, G. & Schwarzkopf, D. S. Comparing different  
761 stimulus configurations for population receptive field mapping in human fMRI. *Front.*  
762 *Hum. Neurosci.* **9**, 96 (2015).
- 763 34. Dougherty, R. F. *et al.* Visual field representations and locations of visual areas V1/2/3 in  
764 human visual cortex. *J. Vis.* **3**, 586–598 (2003).
- 765 35. Harvey, B. M. & Dumoulin, S. O. The Relationship between Cortical Magnification Factor  
766 and Population Receptive Field Size in Human Visual Cortex: Constancies in Cortical  
767 Architecture. *J. Neurosci. Off. J. Soc. Neurosci.* **31**, 13604–13612 (2011).
- 768 36. Pouget, A., Dayan, P. & Zemel, R. Information processing with population codes. *Nat.*  
769 *Rev. Neurosci.* **1**, 125–132 (2000).
- 770 37. Treue, S., Hol, K. & Rauber, H.-J. Seeing multiple directions of motion—physiology and  
771 psychophysics. *Nat. Neurosci.* **3**, 270–276 (2000).
- 772 38. Kay, K. N., Winawer, J., Mezer, A. & Wandell, B. A. Compressive spatial summation in  
773 human visual cortex. *J. Neurophysiol.* **110**, 481–494 (2013).
- 774 39. Harvey, B. M., Fracasso, A., Petridou, N. & Dumoulin, S. O. Topographic representations  
775 of object size and relationships with numerosity reveal generalized quantity processing  
776 in human parietal cortex. *Proc. Natl. Acad. Sci. U. S. A.* **112**, 13525–13530 (2015).
- 777 40. Harvey, B. M., Klein, B. P., Petridou, N. & Dumoulin, S. O. Topographic representation of  
778 numerosity in the human parietal cortex. *Science* **341**, 1123–1126 (2013).
- 779 41. Brainard, D. H. The Psychophysics Toolbox. *Spat. Vis.* **10**, 433–6 (1997).
- 780 42. Lagarias, J., Reeds, J., Wright, M. & Wright, P. Convergence properties of the Nelder—  
781 Mead simplex method in low dimensions. *SIAM J. Optim.* **9**, 112–147 (1998).
- 782 43. Breuer, F. A. *et al.* Controlled aliasing in parallel imaging results in higher acceleration  
783 (CAIPIRINHA) for multi-slice imaging. *Magn. Reson. Med.* **53**, 684–691 (2005).
- 784 44. Dale, A. M., Fischl, B. & Sereno, M. I. Cortical surface-based analysis. I. Segmentation  
785 and surface reconstruction. *NeuroImage* **9**, 179–194 (1999).
- 786 45. Fischl, B., Sereno, M. I. & Dale, A. M. Cortical surface-based analysis. II: Inflation,  
787 flattening, and a surface-based coordinate system. *NeuroImage* **9**, 195–207 (1999).
- 788 46. Nelder, J. A. & Mead, R. A Simplex Method for Function Minimization. *Comput. J.* **7**,  
789 308–313 (1965).

790 **Supplementary Figures**

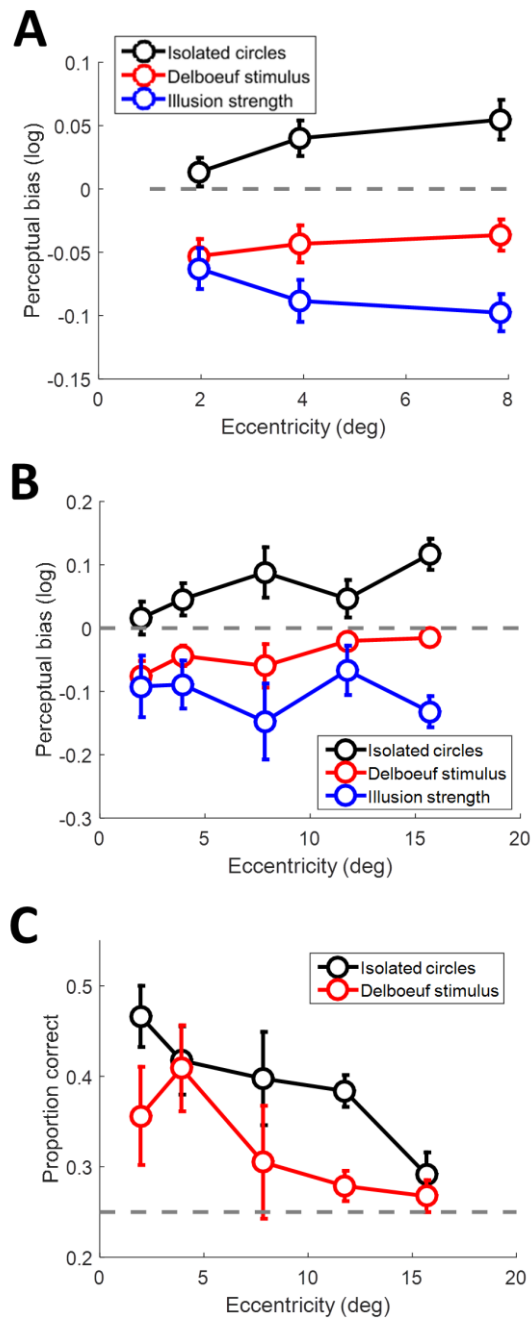

791

792 **Supplementary Figure S1.** A-B. Average perceptual bias (positive and negative: target appears smaller or larger than  
793 reference, respectively) weighted by the acuity (reciprocal of squared dispersion), across individuals plotted against target  
794 eccentricity for simple isolated circles (black), contextual Delboeuf stimuli (red), and relative illusion strength (blue), that is,  
795 the difference in biases measured for the two stimulus conditions. A. Data from 10 observers in the size eccentricity bias  
796 experiment. B. Data from 4 observers in the size far-eccentricity bias experiment. C. Behavioral accuracy on the task in for  
797 the 4 observers in the size far-eccentricity bias experiment. Chance was 25% and is noted by the dashed grey line. In all  
798 plots, error bars denote  $\pm 1$  standard error of the mean.

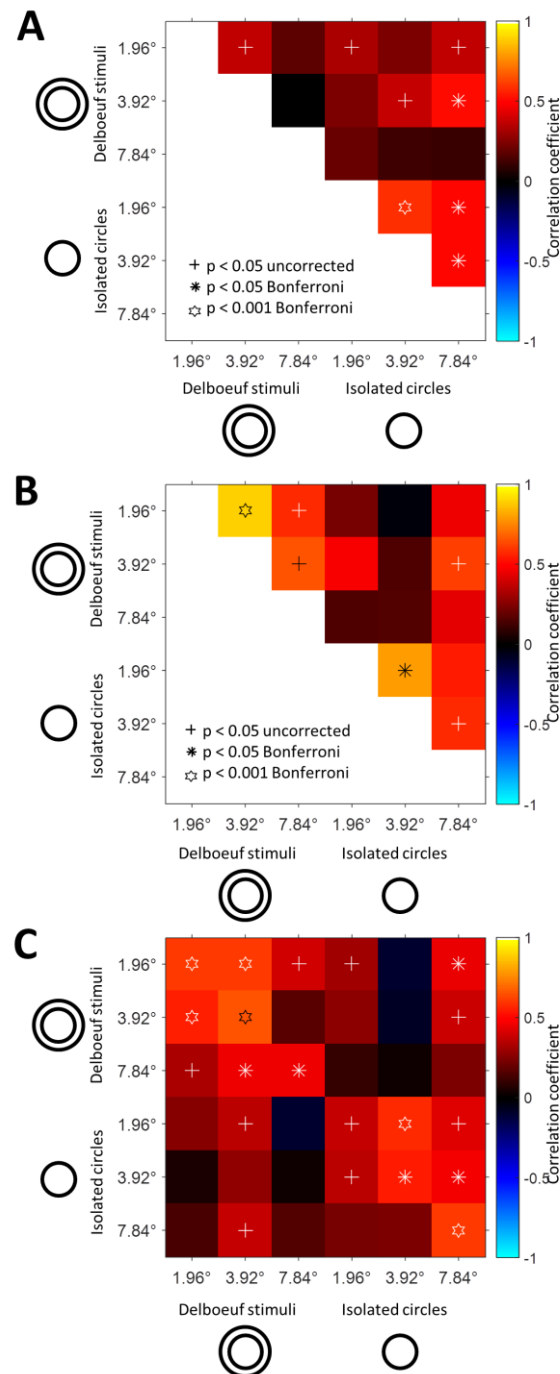

799

800 **Supplementary Figure S2.** Correlation matrices showing the relationship between the perceptual biases in the two  
 801 conditions (isolated circles and Delboeuf stimuli) and at the three stimulus eccentricities. **A.** Correlations after removing  
 802 between-subject variance, i.e. the mean across the biases for the four targets was *subtracted* from each condition. **B.**  
 803 Correlations after removing the within-subject variance, i.e. biases were *averaged* across the four targets in each condition.  
 804 **C.** Correlations between the first and second session of the experiment conducted on different days. All other conventions  
 805 as in Figure 1E. Note that statistical power in **B** is lower relative to the other figures, because after averaging there is only a  
 806 quarter of the number of observations.



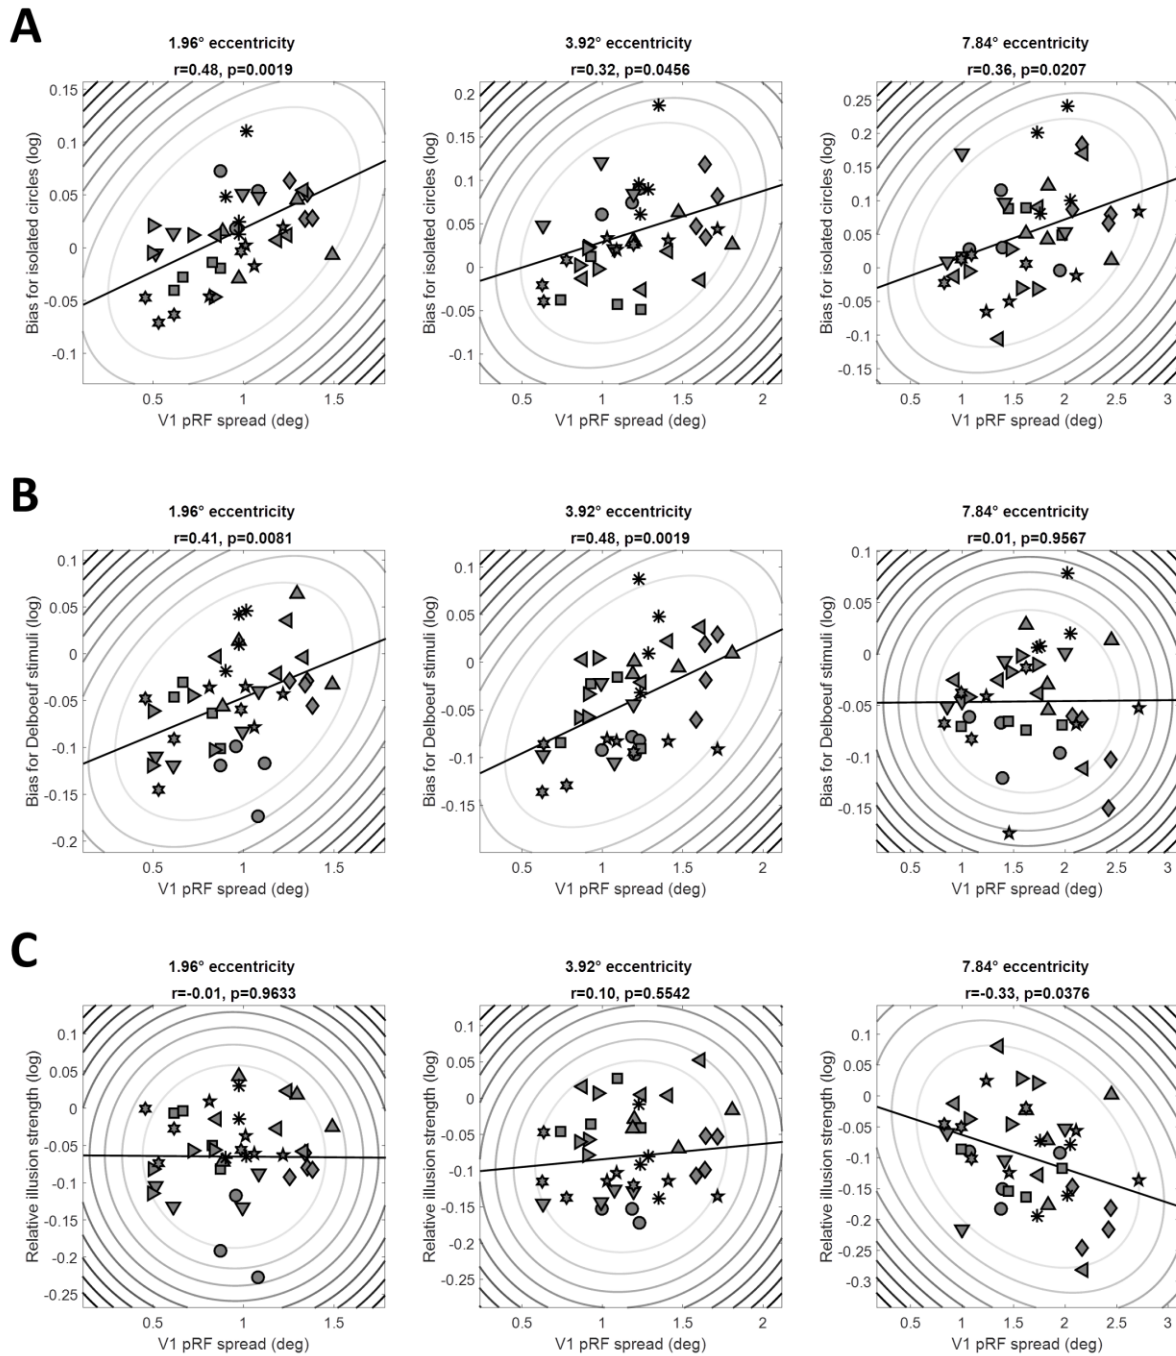

807

808 **Supplementary Figure S3.** Perceptual biases for isolated circles (A), for the Delboeuf stimuli (B), and the relative illusion  
809 strength (C), that is, the bias for Delboeuf stimuli minus the bias for isolated circles, plotted against pRF spread at the  
810 corresponding location in V1 for each observer and stimulus location. Columns show data for stimuli at 1.96°, 3.92°, or  
811 7.84° eccentricity. Symbols denote individual observers. Elliptic contours denote the Mahalanobis distance from the  
812 bivariate mean. The straight, black lines denote the linear regression.

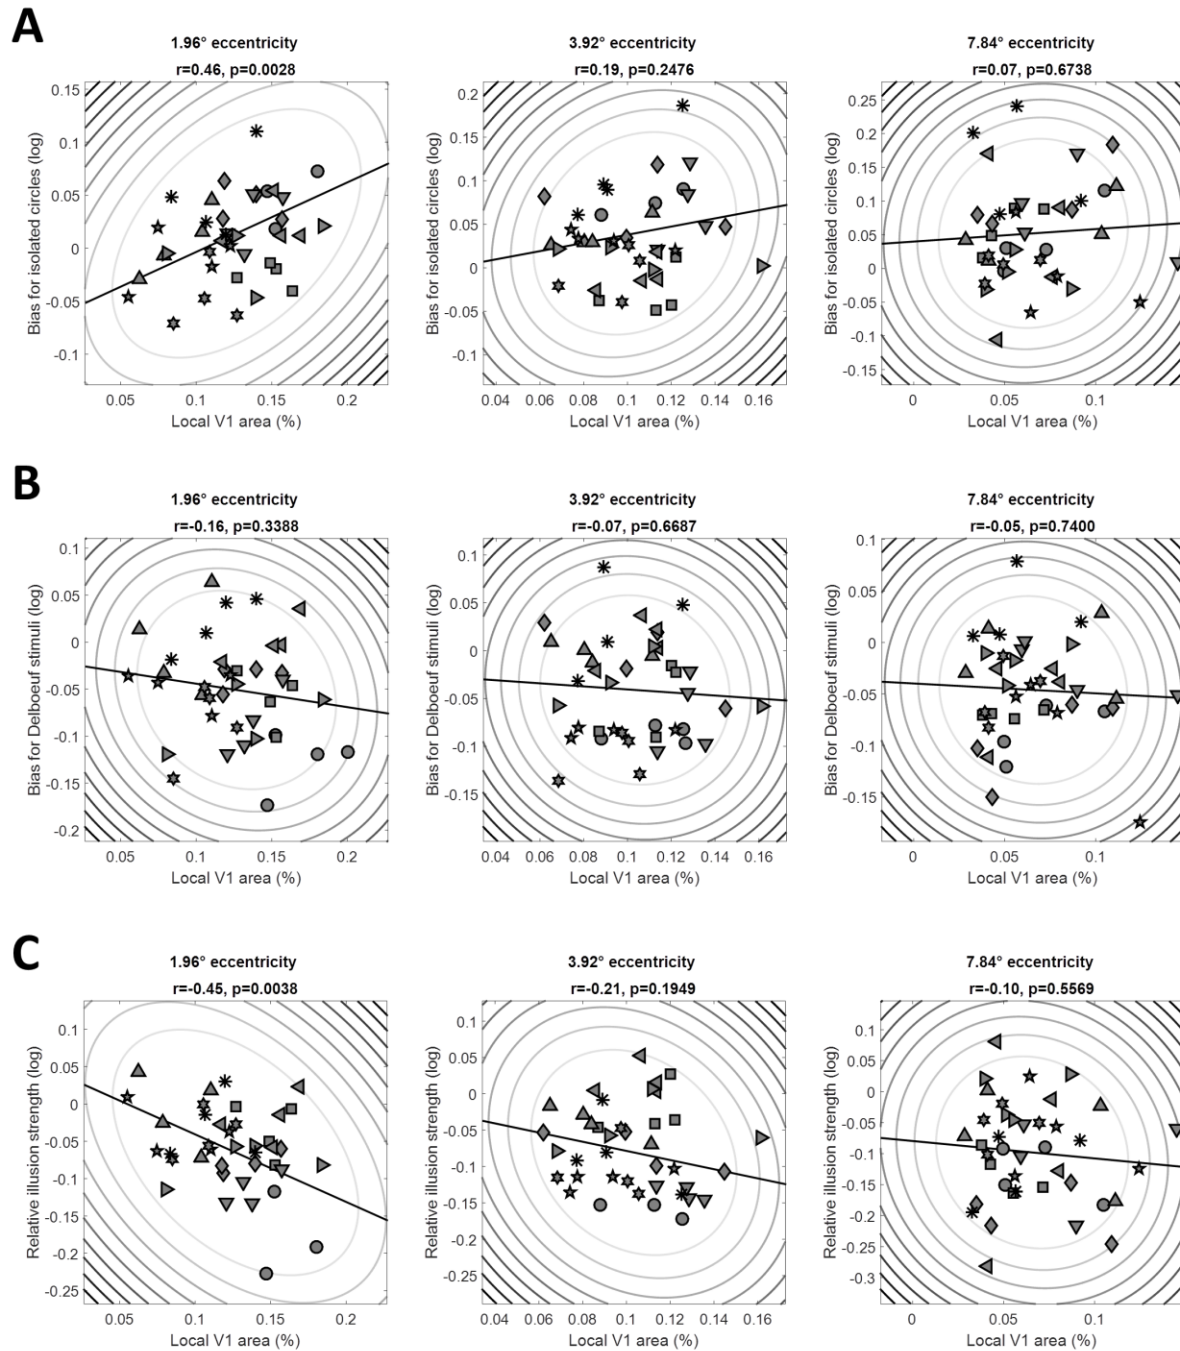

813

814 **Supplementary Figure S4.** Perceptual biases for isolated circles (A), for the Delboeuf stimuli (B), and the relative illusion  
815 strength (C), that is, the bias for Delboeuf stimuli minus the bias for isolated circles, plotted against the surface area of the  
816 corresponding location in V1 for each observer and stimulus location (as percentage of the area of the whole cortical  
817 hemisphere). Columns show data for stimuli at 1.96°, 3.92°, or 7.84° eccentricity. Symbols denote individual observers.  
818 Elliptic contours denote the Mahalanobis distance from the bivariate mean. The straight, black lines denote the linear  
819 regression.

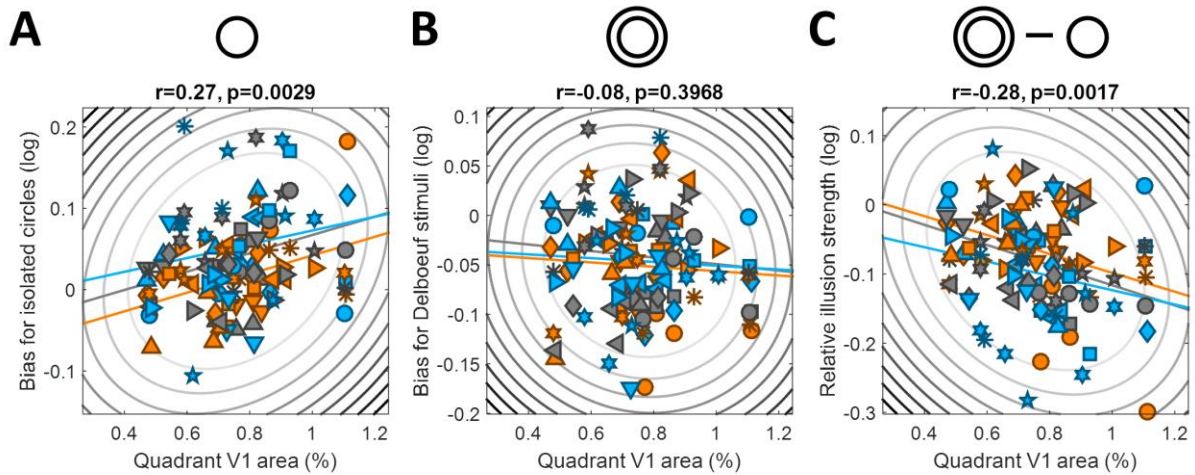

820

821 **Supplementary Figure S5.** Perceptual biases for isolated circles (A), Delboeuf stimuli (B), and the relative illusion strength  
 822 (C) plotted against the surface area (as percentage of the whole cortex) for each quadrant map in V1 between 1° and 9°  
 823 eccentricity and observer. Symbols denote individual observers. Elliptic contours denote the Mahalanobis distance from  
 824 the bivariate mean. The colored, straight lines denote the linear regression separately for each eccentricity. Colors denote  
 825 stimuli at 1.96° (orange), 3.92° (grey), or 7.84° (light blue) eccentricity.

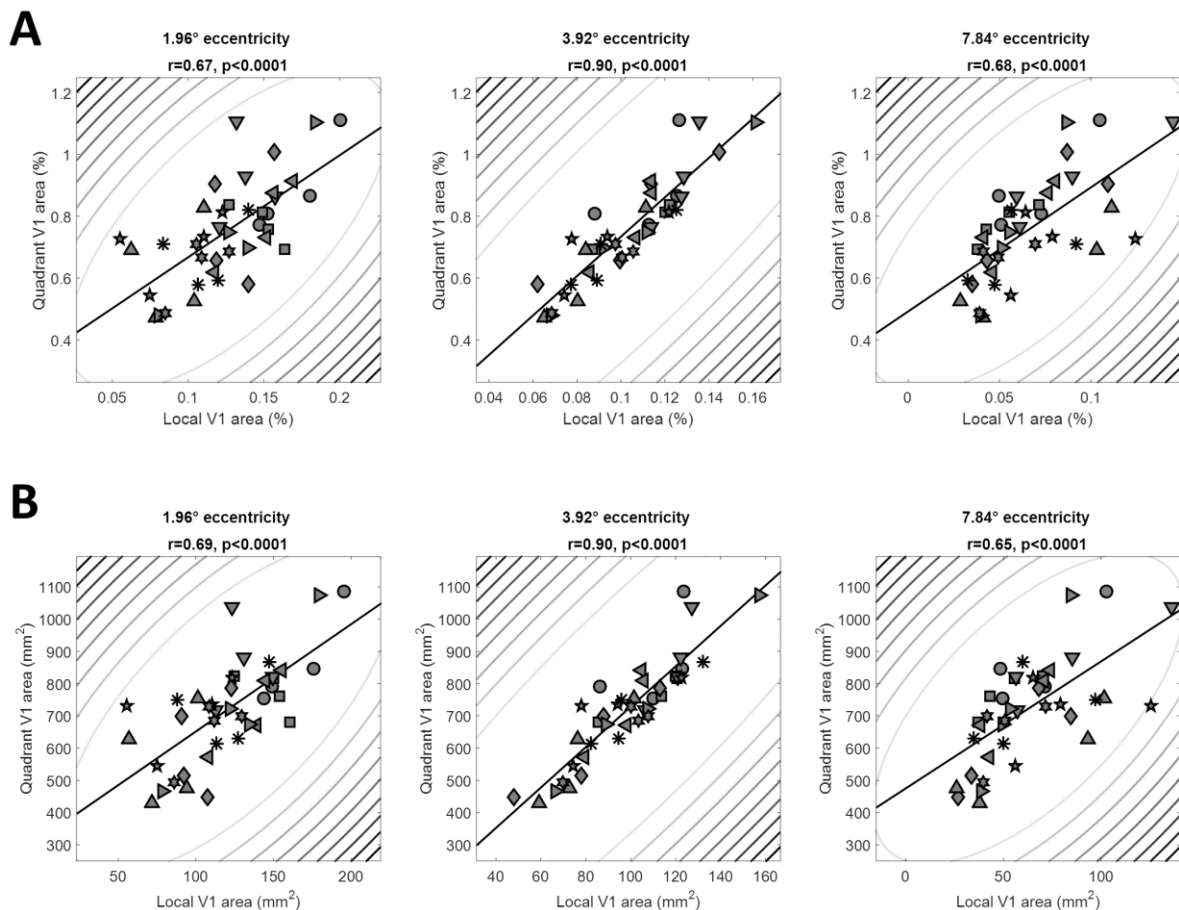

826

827 **Supplementary Figure S6.** The surface area of the whole quadrant map in V1 between 1° and 9° eccentricity and each  
 828 observer plotted against the surface area of the corresponding location in V1 for each observer and target stimulus  
 829 location. Surface area is expressed either as a percentage of the whole cortical hemisphere (A) or as absolute area (B).  
 830 Columns show data for stimuli at 1.96°, 3.92°, or 7.84° eccentricity. Symbols denote individual observers. Elliptic contours  
 831 denote the Mahalanobis distance from the bivariate mean. The straight, black lines denote the linear regression.

## 832 **Supplementary Data File caption**

833 Mean V1 pRF spread for the four visual field quadrants (top four panels) and V1 surface area (bottom four panels) plotted  
834 for eccentricity bands 1° in width. The vertical dashed red lines indicate the eccentricities of target stimuli in the  
835 psychophysical experiments. The solid black lines denote the fitted polynomial functions. Each page shows plots from one  
836 observer.

837

## 838 **Supplementary Information**

### 839 *Reliability of perceptual bias estimates*

840 We further confirmed the reliability of these bias estimates by comparing estimates from two  
841 sessions conducted on different days (Supplementary Figure S2C). Moreover, 9 of our observers  
842 were tested twice, with approximately one year between sessions. Despite the long time between  
843 experiments and variation in the stimulus sampling procedure (see Methods), estimates of  
844 perceptual biases at target eccentricity 3.92° (which was common to both experiments) were  
845 correlated ( $r=0.35$ ,  $p=0.0373$ ,  $n=36$ ). This correlation was largely driven by the within-subject  
846 variance, and was considerably greater after subtracting the mean across the four target locations  
847 for every condition ( $r=0.58$ ,  $p=0.0002$ ,  $n=36$ ). In contrast, removing the within-subject variance by  
848 averaging bias estimates across the four targets reduced the correlation substantially ( $r=0.18$ ,  
849  $p=0.6483$ ,  $n=36$ ). Finally, 4 observers repeated the experiment two years after the initial experiment,  
850 allowing us to compare biases for the three eccentricities tested in the original experiment ( $n=48$ ).  
851 We again found a strong reliability of idiosyncratic biases ( $r=0.47$ ,  $p=0.001$ ,  $n=48$ ; after removing  
852 between-subject variance:  $r=0.71$ ,  $p<0.001$ ,  $n=48$ ).

### 853 *Intra-individual differences analysis*

854 For each observer we obtained separate measures of perceptual bias and cortical measures  
855 corresponding to 12 visual field locations. We then calculated correlations by comparing all locations  
856 (120 data points) or across quadrants but separately for each eccentricity (40 data points). Naturally,  
857 multiple observations for a given participant are not strictly independent. Therefore, as described in  
858 the main text we performed four parallel analyses:

- 859 1. *Pooled data (all variance)*: The main analyses reported in our study simply show the pooled  
860 data without any additional processing. They therefore compare the 120 (or 40, when  
861 separating eccentricities) data points with each visual field location as a separate data point  
862 (Figure 2 C-E; Figure S3 A-C). This approach is the most inclusive as it incorporates both the  
863 within-subject variance (the pattern of variability across visual field locations) as well as the  
864 conventional between-subject variance (differences between individual observers that affect  
865 all visual field locations in a given observer equally). Our hypothesis that cortical  
866 idiosyncrasies in pRF spread/surface area relate to perceptual biases suggests that both  
867 between- and within-subject variance should contribute similarly to the correlation.
- 868 2. *Within-subject variance only*: We also calculated correlations after removing the between-  
869 subject variance by first subtracting the mean of measurements across the four visual field  
870 locations from each eccentricity and observer. This way the correlation only takes into  
871 account the variability across quadrants within each observer/eccentricity.
- 872 3. *Second-level analysis of within-subject variance*: In an alternative analysis using only the  
873 within-subject variance we calculated the correlation between the two variables separately



874 for each eccentricity and each observer, and then determined whether the average  
875 correlation (after Fisher's z-transformation to linearize  $r$ ) is significantly different from zero.  
876 However, this approach is comparably underpowered because it relies on only four data  
877 points (one per visual field quadrant) for each observer and eccentricity. Thus, each  
878 individual correlation coefficient is likely to be skewed by outliers or individual unreliable  
879 measurements and this approach is prone to both type I and type II error.

880 4. *Canonical correlation analysis*: Finally, we used established canonical correlation analysis  
881 (*canoncorr* in MATLAB). This allows the use of multiple dimensions (i.e. the different  
882 stimulus locations) per data point; however, this procedure overcomplicates the problem  
883 because it determines a linear combination of the different dimensions whereas we are  
884 strictly interested in comparing the perceptual bias measured at one location to the  
885 corresponding cortical measures.

886

#### 887 *Power analysis*

888 To confirm the validity of our analysis approach, we conducted simulations to determine its  
889 statistical power. In 10,000 simulations we generated random data sets with the same sample sizes  
890 and dimensionality of our data to test three situations: A) Complete null hypothesis: the two  
891 variables were completely uncorrelated. B) Complete alternative hypothesis: The 120 data points  
892 were chosen from the same underlying distribution with a population correlation of 0.3. This is the  
893 alternative hypothesis we seek to test in this study, because it assumes that variability in cortical  
894 measures (pRF spread or cortical surface area) is directly linked to perceptual biases. C) Between-  
895 subject relationship only: two variables of 10 subjects with 12 stimulus locations were correlated  
896 (using population correlation of 0.3) but the within-subject variance was random noise (Gaussian  
897 noise with 0.5 standard deviations) added to the 4 observations for each observer and eccentricity.  
898 This situation assumes the effect is solely driven by the between-subject variance and within-subject  
899 variance is merely measurement noise within each observer.

900 These simulations showed that all four analyses (see *Intra-individual differences analysis*) have  
901 nominal levels of false positives (~5%) when the null hypothesis is true (situation A), except for  
902 analysis 2 (within-subject variance only) which somewhat inflates false positive rates to around 9%.  
903 Conversely, for situation B when the alternative hypothesis is true and there is a direct relationship  
904 between the two variables, analyses 1 and 2 are most sensitive with a statistical power of  
905 approximately 92% and 89%, respectively. The other two analyses are far less sensitive (65% power  
906 for analysis 3, and 42% power for analysis 4). Finally, in situation C when the relationship is only  
907 driven by the between-subject variance, statistical power for analyses 1 is still moderately high (65%)  
908 but as expected power for all the analyses is much lower (9% and 10% for analyses 2 and 4,  
909 respectively, and at the alpha level of 5% for analysis 3). Thus if our hypothesis of a direct link of the  
910 within-subject variability in perceptual biases and V1 measures were untrue and the relationship  
911 was mainly driven by between-subject variance, we would have been unlikely to detect any  
912 correlations in these control analyses. This is clearly not the case as the pattern of results is  
913 qualitatively very similar between the four analyses in most cases – especially the main result  
914 comparing pRF spread to perceptual biases of isolate circles is highly significant in all four analyses  
915 (Table 1).
